# Supplementary material for: Genome-wide screening for differentially methylated long noncoding RNAs identifies LIFR-AS1 as an epigenetically regulated lncRNA that inhibits the progression of colorectal cancer
Source: Clin Epigenetics. 2022 Oct 31;14:138. doi: 10.1186/s13148-022-01361-0 (PMC9624034; doi:10.1186/s13148-022-01361-0)
Supplement: Supplementary file 2 — Additional file 2: Table S1. The characteristics of methylation-driven lncRNAs. [file 13148_2022_1361_MOESM2_ESM.xlsx]

## Sheet: methylation-driven lncRNAs
Additional file 2: Table S1. The characteristics of methylation-driven lncRNAs
probe	deltaBeta	P.Value	adj.P.Val	Ensembl_ID	symbol	type	chrom	chromStart	chromEnd	log2FoldChange	lfcSE	stat	pvalue	padj
cg01585333	-0.0875249	2.03e-05	8.59e-05	ENSG00000130600.14	H19	processed_transcript	chr11	1995163	2001470	3.63511	0.346576	10.4886	9.74e-26	1.42e-24
cg25821896	-0.0554011	0.00320067	0.00879048	ENSG00000130600.14	H19	processed_transcript	chr11	1995163	2001470	3.63511	0.346576	10.4886	9.74e-26	1.42e-24
cg09452478	-0.037291	0.0157123	0.0355923	ENSG00000130600.14	H19	processed_transcript	chr11	1995163	2001470	3.63511	0.346576	10.4886	9.74e-26	1.42e-24
cg27058018	-0.0369064	6.83e-06	3.11e-05	ENSG00000163597.13	RP11-666A8.8, SNHG16	processed_transcript	chr17	76557766	76565348	1.36177	0.0916982	14.8505	6.9e-50	4.61e-48
cg08063125	0.381994	3.77e-31	2.33e-29	ENSG00000166770.9	ZNF667-AS1	lincRNA	chr19	56477250	56500666	-1.82866	0.171394	-10.6693	1.42e-26	2.19e-25
cg03289872	0.244053	5.43e-22	1.39e-20	ENSG00000166770.9	ZNF667-AS1	lincRNA	chr19	56477250	56500666	-1.82866	0.171394	-10.6693	1.42e-26	2.19e-25
cg26612735	0.237697	1.81e-29	9.56e-28	ENSG00000166770.9	ZNF667-AS1	lincRNA	chr19	56477250	56500666	-1.82866	0.171394	-10.6693	1.42e-26	2.19e-25
cg00502665	0.231652	1.78e-24	5.78e-23	ENSG00000166770.9	ZNF667-AS1	lincRNA	chr19	56477250	56500666	-1.82866	0.171394	-10.6693	1.42e-26	2.19e-25
cg24464397	0.223151	1.35e-26	5.41e-25	ENSG00000166770.9	ZNF667-AS1	lincRNA	chr19	56477250	56500666	-1.82866	0.171394	-10.6693	1.42e-26	2.19e-25
cg24732137	0.12043	3.19e-10	2.54e-09	ENSG00000166770.9	ZNF667-AS1	lincRNA	chr19	56477250	56500666	-1.82866	0.171394	-10.6693	1.42e-26	2.19e-25
cg01981601	0.274923	1.39e-13	1.59e-12	ENSG00000167912.5	RP11-25K19.1	antisense	chr8	59119040	59121346	-1.37221	0.212099	-6.46967	9.82e-11	4.29e-10
cg19003304	0.240451	2.03e-20	4.48e-19	ENSG00000167912.5	RP11-25K19.1	antisense	chr8	59119040	59121346	-1.37221	0.212099	-6.46967	9.82e-11	4.29e-10
cg27496650	0.0413571	0.0210901	0.0458425	ENSG00000167912.5	RP11-25K19.1	antisense	chr8	59119040	59121346	-1.37221	0.212099	-6.46967	9.82e-11	4.29e-10
cg15686334	0.0284199	7.18e-05	0.000276545	ENSG00000167912.5	RP11-25K19.1	antisense	chr8	59119040	59121346	-1.37221	0.212099	-6.46967	9.82e-11	4.29e-10
cg09701880	-0.51144	2.15e-74	4.46e-71	ENSG00000172965.13	AC017002.2, MIR4435-1HG	lincRNA	chr2	111196350	111495100	1.47153	0.108628	13.5466	8.3e-42	3.38e-40
cg03088878	-0.127307	1.76e-06	8.74e-06	ENSG00000174171.5	RP11-23P13.6	antisense	chr15	41892793	41898575	4.12249	0.319449	12.905	4.22e-38	1.37e-36
cg10279991	-0.14053	3.55e-08	2.21e-07	ENSG00000174365.18	SNHG11	processed_transcript	chr20	38446578	38450921	1.22235	0.123787	9.87461	5.36e-23	6.38e-22
cg26306893	-0.115759	5.83e-10	4.51e-09	ENSG00000174365.18	SNHG11	processed_transcript	chr20	38446578	38450921	1.22235	0.123787	9.87461	5.36e-23	6.38e-22
cg09011256	-0.0217395	0.0148062	0.0338044	ENSG00000174365.18	SNHG11	processed_transcript	chr20	38446578	38450921	1.22235	0.123787	9.87461	5.36e-23	6.38e-22
cg13581507	-0.0075069	0.0128254	0.0298487	ENSG00000174365.18	SNHG11	processed_transcript	chr20	38446578	38450921	1.22235	0.123787	9.87461	5.36e-23	6.38e-22
cg25567337	0.256784	3.58e-19	7.05e-18	ENSG00000174403.14	C20orf166-AS1	antisense	chr20	62544343	62551526	-3.29045	0.326825	-10.0679	7.66e-24	9.75e-23
cg00499838	0.230744	1.53e-12	1.57e-11	ENSG00000174403.14	C20orf166-AS1	antisense	chr20	62544343	62551526	-3.29045	0.326825	-10.0679	7.66e-24	9.75e-23
cg26379383	0.22238	8.78e-10	6.66e-09	ENSG00000174403.14	C20orf166-AS1	antisense	chr20	62544343	62551526	-3.29045	0.326825	-10.0679	7.66e-24	9.75e-23
cg13264941	0.219347	1.22e-09	9.1e-09	ENSG00000174403.14	C20orf166-AS1	antisense	chr20	62544343	62551526	-3.29045	0.326825	-10.0679	7.66e-24	9.75e-23
cg12039664	0.212589	1.57e-09	1.16e-08	ENSG00000174403.14	C20orf166-AS1	antisense	chr20	62544343	62551526	-3.29045	0.326825	-10.0679	7.66e-24	9.75e-23
cg27578726	0.192777	2.24e-10	1.82e-09	ENSG00000174403.14	C20orf166-AS1	antisense	chr20	62544343	62551526	-3.29045	0.326825	-10.0679	7.66e-24	9.75e-23
cg14126020	0.182	7.98e-07	4.15e-06	ENSG00000174403.14	C20orf166-AS1	antisense	chr20	62544343	62551526	-3.29045	0.326825	-10.0679	7.66e-24	9.75e-23
cg27447740	0.154273	4.38e-06	2.05e-05	ENSG00000174403.14	C20orf166-AS1	antisense	chr20	62544343	62551526	-3.29045	0.326825	-10.0679	7.66e-24	9.75e-23
cg24176678	0.15172	4.37e-08	2.69e-07	ENSG00000174403.14	C20orf166-AS1	antisense	chr20	62544343	62551526	-3.29045	0.326825	-10.0679	7.66e-24	9.75e-23
cg09750382	0.140334	7.93e-07	4.13e-06	ENSG00000174403.14	C20orf166-AS1	antisense	chr20	62544343	62551526	-3.29045	0.326825	-10.0679	7.66e-24	9.75e-23
cg26844459	0.0613037	0.00794578	0.0196708	ENSG00000174403.14	C20orf166-AS1	antisense	chr20	62544343	62551526	-3.29045	0.326825	-10.0679	7.66e-24	9.75e-23
cg04190784	-0.00825573	6.98e-05	0.000269309	ENSG00000177410.11	ZFAS1	antisense	chr20	49278178	49295738	1.79049	0.134667	13.2958	2.45e-40	9.17e-39
cg08430355	-0.00446546	0.000665294	0.00213255	ENSG00000177410.11	ZFAS1	antisense	chr20	49278178	49295738	1.79049	0.134667	13.2958	2.45e-40	9.17e-39
cg05463325	-0.0609895	0.000154282	0.000559387	ENSG00000177788.5	RP5-1061H20.4	lincRNA	chr1	229258281	229271028	1.09778	0.146606	7.48793	7e-14	4.15e-13
cg23959311	-0.0559367	0.0010104	0.00311554	ENSG00000177788.5	RP5-1061H20.4	lincRNA	chr1	229258281	229271028	1.09778	0.146606	7.48793	7e-14	4.15e-13
cg06646021	-0.0513813	9.14e-05	0.000345624	ENSG00000177788.5	RP5-1061H20.4	lincRNA	chr1	229258281	229271028	1.09778	0.146606	7.48793	7e-14	4.15e-13
cg03301331	-0.0190133	0.00306724	0.00846115	ENSG00000177788.5	RP5-1061H20.4	lincRNA	chr1	229258281	229271028	1.09778	0.146606	7.48793	7e-14	4.15e-13
cg02659149	0.00350432	0.00264295	0.00740893	ENSG00000186594.11	MIR22HG	lincRNA	chr17	1711493	1717174	-1.77535	0.13283	-13.3656	9.61e-41	3.67e-39
cg02192117	-0.0971078	1.41e-20	3.16e-19	ENSG00000188365.3	AC093620.5, AC092171.2	antisense	chr7	5419846	5423122	2.0017	0.262256	7.63263	2.3e-14	1.42e-13
cg20518511	-0.032097	2.14e-07	1.21e-06	ENSG00000188365.3	AC093620.5, AC092171.2	antisense	chr7	5419846	5423122	2.0017	0.262256	7.63263	2.3e-14	1.42e-13
cg03888553	-0.0904438	0.00011379	0.000422988	ENSG00000189149.10	CRYM-AS1	lincRNA	chr16	21300849	21318591	1.20285	0.190521	6.31351	2.73e-10	1.14e-09
cg17308044	-0.308817	1.3e-26	5.2e-25	ENSG00000196756.10	SNHG17	processed_transcript	chr20	38420588	38435353	2.11979	0.147909	14.3317	1.39e-46	7.69e-45
cg03079640	-0.208482	3.94e-16	5.82e-15	ENSG00000196756.10	SNHG17	processed_transcript	chr20	38420588	38435353	2.11979	0.147909	14.3317	1.39e-46	7.69e-45
cg00575851	0.140768	0.000182903	0.000654442	ENSG00000196972.7	LINC00087	lincRNA	chrX	135095028	135098634	-1.51262	0.166229	-9.09961	9.07e-20	8.65e-19
cg16199850	0.0627309	0.021061	0.0457897	ENSG00000196972.7	LINC00087	lincRNA	chrX	135095028	135098634	-1.51262	0.166229	-9.09961	9.07e-20	8.65e-19
cg01709312	0.0334288	0.0007796	0.00246322	ENSG00000203497.2	PDCD4-AS1	antisense	chr10	110869868	110872233	-1.46863	0.0995941	-14.7462	3.26e-49	2.1e-47
cg09731288	0.00740483	0.0110987	0.0263206	ENSG00000203497.2	PDCD4-AS1	antisense	chr10	110869868	110872233	-1.46863	0.0995941	-14.7462	3.26e-49	2.1e-47
cg24903527	0.00601574	0.000178121	0.000638463	ENSG00000203497.2	PDCD4-AS1	antisense	chr10	110869868	110872233	-1.46863	0.0995941	-14.7462	3.26e-49	2.1e-47
cg13244260	0.00582774	0.000747674	0.00237164	ENSG00000203497.2	PDCD4-AS1	antisense	chr10	110869868	110872233	-1.46863	0.0995941	-14.7462	3.26e-49	2.1e-47
cg26881277	0.00446334	0.000373118	0.00125819	ENSG00000203497.2	PDCD4-AS1	antisense	chr10	110869868	110872233	-1.46863	0.0995941	-14.7462	3.26e-49	2.1e-47
cg07441152	-0.245447	1.21e-24	4.01e-23	ENSG00000203499.9	FAM83H-AS1	lincRNA	chr8	143734140	143746337	2.85087	0.131908	21.6125	1.37e-103	8.42e-101
cg05913474	-0.106326	1.12e-08	7.42e-08	ENSG00000203499.9	FAM83H-AS1	lincRNA	chr8	143734140	143746337	2.85087	0.131908	21.6125	1.37e-103	8.42e-101
cg26039042	-0.0715016	2.06e-06	1.01e-05	ENSG00000203499.9	FAM83H-AS1	lincRNA	chr8	143734140	143746337	2.85087	0.131908	21.6125	1.37e-103	8.42e-101
cg01854491	-0.0531552	2.2e-05	9.22e-05	ENSG00000203499.9	FAM83H-AS1	lincRNA	chr8	143734140	143746337	2.85087	0.131908	21.6125	1.37e-103	8.42e-101
cg02304930	0.0275812	0.0166141	0.037337	ENSG00000203706.7	SERTAD4-AS1	antisense	chr1	210231456	210234047	-1.62556	0.185812	-8.74842	2.16e-18	1.85e-17
cg14159026	0.477198	1.12e-23	3.37e-22	ENSG00000203808.9	BVES-AS1	antisense	chr6	105136308	105169945	-3.24352	0.311051	-10.4276	1.86e-25	2.65e-24
cg17398252	0.421737	1.79e-22	4.8e-21	ENSG00000203808.9	BVES-AS1	antisense	chr6	105136308	105169945	-3.24352	0.311051	-10.4276	1.86e-25	2.65e-24
cg25280433	0.369207	3.48e-26	1.34e-24	ENSG00000203808.9	BVES-AS1	antisense	chr6	105136308	105169945	-3.24352	0.311051	-10.4276	1.86e-25	2.65e-24
cg20624391	0.344908	8.78e-22	2.2e-20	ENSG00000203808.9	BVES-AS1	antisense	chr6	105136308	105169945	-3.24352	0.311051	-10.4276	1.86e-25	2.65e-24
cg14314653	0.314015	1.66e-11	1.52e-10	ENSG00000203808.9	BVES-AS1	antisense	chr6	105136308	105169945	-3.24352	0.311051	-10.4276	1.86e-25	2.65e-24
cg10979880	0.282095	4.48e-12	4.37e-11	ENSG00000203808.9	BVES-AS1	antisense	chr6	105136308	105169945	-3.24352	0.311051	-10.4276	1.86e-25	2.65e-24
cg01513081	0.252213	4.62e-11	4.04e-10	ENSG00000203808.9	BVES-AS1	antisense	chr6	105136308	105169945	-3.24352	0.311051	-10.4276	1.86e-25	2.65e-24
cg10145449	-0.287456	3.09e-25	1.08e-23	ENSG00000204791.7	CTD-3065J16.6	antisense	chr8	144049129	144051522	1.79019	0.220297	8.12626	4.43e-16	3.17e-15
cg00423068	-0.212499	5.59e-20	1.18e-18	ENSG00000204791.7	CTD-3065J16.6	antisense	chr8	144049129	144051522	1.79019	0.220297	8.12626	4.43e-16	3.17e-15
cg15915427	0.0997622	3.39e-05	0.000137973	ENSG00000205037.2	RP11-863P13.4	lincRNA	chr16	88088041	88100985	-2.21805	0.31571	-7.02559	2.13e-12	1.09e-11
cg03072681	0.0934035	0.000357067	0.00120863	ENSG00000205037.2	RP11-863P13.4	lincRNA	chr16	88088041	88100985	-2.21805	0.31571	-7.02559	2.13e-12	1.09e-11
cg23151014	0.119386	3.9e-07	2.12e-06	ENSG00000206113.6	RP11-503N18.1	lincRNA	chr4	2418974	2450360	-1.63762	0.209226	-7.82702	5e-15	3.28e-14
cg10797959	0.00686464	0.00213516	0.00611877	ENSG00000206113.6	RP11-503N18.1	lincRNA	chr4	2418974	2450360	-1.63762	0.209226	-7.82702	5e-15	3.28e-14
cg00852041	0.00149726	0.0166828	0.0374714	ENSG00000206113.6	RP11-503N18.1	lincRNA	chr4	2418974	2450360	-1.63762	0.209226	-7.82702	5e-15	3.28e-14
cg22512573	-0.393656	2.57e-19	5.13e-18	ENSG00000214039.7	RP11-474D1.4, RP11-474D1.3	lincRNA	chr12	130033454	130045057	9.15087	0.380601	24.0432	9.83e-128	1.39e-124
cg26430081	-0.333859	7.86e-20	1.64e-18	ENSG00000214039.7	RP11-474D1.4, RP11-474D1.3, RP11-474D1.1	lincRNA	chr12	130033454	130045057	9.15087	0.380601	24.0432	9.83e-128	1.39e-124
cg11334644	-0.322986	1.8e-51	7.54e-49	ENSG00000214039.7	RP11-474D1.4, RP11-474D1.3, RP11-474D1.1	lincRNA	chr12	130033454	130045057	9.15087	0.380601	24.0432	9.83e-128	1.39e-124
cg24541425	-0.253676	6.31e-19	1.22e-17	ENSG00000214039.7	RP11-474D1.4, RP11-474D1.3	lincRNA	chr12	130033454	130045057	9.15087	0.380601	24.0432	9.83e-128	1.39e-124
cg05863637	-0.229851	2.75e-14	3.37e-13	ENSG00000214039.7	RP11-474D1.4, RP11-474D1.3, RP11-474D1.1	lincRNA	chr12	130033454	130045057	9.15087	0.380601	24.0432	9.83e-128	1.39e-124
cg17226286	-0.196691	8e-11	6.81e-10	ENSG00000214039.7	RP11-474D1.4, RP11-474D1.3, RP11-474D1.1	lincRNA	chr12	130033454	130045057	9.15087	0.380601	24.0432	9.83e-128	1.39e-124
cg06153623	-0.0427567	0.0104906	0.0250616	ENSG00000214039.7	RP11-474D1.4, RP11-474D1.3, RP11-474D1.1	lincRNA	chr12	130033454	130045057	9.15087	0.380601	24.0432	9.83e-128	1.39e-124
cg18352648	-0.114655	4.07e-07	2.21e-06	ENSG00000214049.6	UCA1	processed_transcript	chr19	15828961	15836320	3.97175	0.320235	12.4026	2.53e-35	6.78e-34
cg18221226	-0.0333803	0.00733615	0.0183397	ENSG00000214650.2	RP11-83B20.1	lincRNA	chr12	124513222	124514813	2.11985	0.358765	5.90876	3.45e-09	1.28e-08
cg16350126	-0.0285767	0.00256553	0.00721428	ENSG00000214650.2	RP11-83B20.1	lincRNA	chr12	124513222	124514813	2.11985	0.358765	5.90876	3.45e-09	1.28e-08
cg02575675	-0.137539	4.15e-06	1.95e-05	ENSG00000214725.6	CDIPT-AS1	antisense	chr16	29863593	29868053	2.79158	0.352132	7.92766	2.23e-15	1.51e-14
cg24235633	-0.123861	5.59e-06	2.58e-05	ENSG00000214725.6	CDIPT-AS1	antisense	chr16	29863593	29868053	2.79158	0.352132	7.92766	2.23e-15	1.51e-14
cg01827781	-0.0881284	0.000177958	0.000637906	ENSG00000214725.6	CDIPT-AS1	antisense	chr16	29863593	29868053	2.79158	0.352132	7.92766	2.23e-15	1.51e-14
cg21346966	-0.12492	8.33e-12	7.9e-11	ENSG00000222032.1	AC112721.2	lincRNA	chr2	237428920	237434822	3.55619	0.459064	7.74661	9.44e-15	6.05e-14
cg00863099	-0.446036	6.17e-39	8.11e-37	ENSG00000222041.9	LINC00152	lincRNA	chr2	87455368	87606805	1.34502	0.129284	10.4036	2.39e-25	3.38e-24
cg21306006	0.364289	9.3e-35	8.18e-33	ENSG00000223414.2	LINC00473	lincRNA	chr6	165908802	165988048	-1.58809	0.362819	-4.37708	1.2e-05	2.89e-05
cg08267489	0.21299	1.25e-07	7.25e-07	ENSG00000223414.2	LINC00473	lincRNA	chr6	165908802	165988048	-1.58809	0.362819	-4.37708	1.2e-05	2.89e-05
cg14026561	0.211222	6.09e-07	3.22e-06	ENSG00000223414.2	LINC00473	lincRNA	chr6	165908802	165988048	-1.58809	0.362819	-4.37708	1.2e-05	2.89e-05
cg16289417	0.190811	3.41e-06	1.62e-05	ENSG00000223414.2	LINC00473	lincRNA	chr6	165908802	165988048	-1.58809	0.362819	-4.37708	1.2e-05	2.89e-05
cg05861708	0.142236	6.86e-05	0.000265264	ENSG00000223414.2	LINC00473	lincRNA	chr6	165908802	165988048	-1.58809	0.362819	-4.37708	1.2e-05	2.89e-05
cg01579841	0.132128	4.1e-05	0.000164827	ENSG00000223414.2	LINC00473	lincRNA	chr6	165908802	165988048	-1.58809	0.362819	-4.37708	1.2e-05	2.89e-05
cg12254291	0.124301	0.000399466	0.00133983	ENSG00000223414.2	LINC00473	lincRNA	chr6	165908802	165988048	-1.58809	0.362819	-4.37708	1.2e-05	2.89e-05
cg12167167	0.122468	5.91e-05	0.000230859	ENSG00000223414.2	LINC00473	lincRNA	chr6	165908802	165988048	-1.58809	0.362819	-4.37708	1.2e-05	2.89e-05
cg06128195	0.0878707	0.000236123	0.000827178	ENSG00000223414.2	LINC00473	lincRNA	chr6	165908802	165988048	-1.58809	0.362819	-4.37708	1.2e-05	2.89e-05
cg12174276	0.0773429	0.000121655	0.000449866	ENSG00000223414.2	LINC00473	lincRNA	chr6	165908802	165988048	-1.58809	0.362819	-4.37708	1.2e-05	2.89e-05
cg02465374	0.0718623	0.00939261	0.0227531	ENSG00000223414.2	LINC00473	lincRNA	chr6	165908802	165988048	-1.58809	0.362819	-4.37708	1.2e-05	2.89e-05
cg26577169	0.0615757	0.00738385	0.0184454	ENSG00000223414.2	LINC00473	lincRNA	chr6	165908802	165988048	-1.58809	0.362819	-4.37708	1.2e-05	2.89e-05
cg09149149	0.044305	0.0213849	0.0463946	ENSG00000223414.2	LINC00473	lincRNA	chr6	165908802	165988048	-1.58809	0.362819	-4.37708	1.2e-05	2.89e-05
cg05280750	0.0788987	0.0192721	0.0424308	ENSG00000223573.5	TINCR	lincRNA	chr19	5558167	5568034	-2.88304	0.287757	-10.019	1.26e-23	1.57e-22
cg12922492	-0.285138	5.08e-11	4.42e-10	ENSG00000224116.5	INHBA-AS1	antisense	chr7	41693916	41779388	2.78804	0.353308	7.89123	2.99e-15	2e-14
cg07650391	-0.15242	3.37e-07	1.85e-06	ENSG00000224116.5	INHBA-AS1	antisense	chr7	41693916	41779388	2.78804	0.353308	7.89123	2.99e-15	2e-14
cg18676273	-0.13394	3.91e-07	2.12e-06	ENSG00000224116.5	INHBA-AS1	antisense	chr7	41693916	41779388	2.78804	0.353308	7.89123	2.99e-15	2e-14
cg05877565	-0.0988193	2.68e-05	0.000110956	ENSG00000224116.5	INHBA-AS1	antisense	chr7	41693916	41779388	2.78804	0.353308	7.89123	2.99e-15	2e-14
cg00285343	-0.0705049	0.00947767	0.0229321	ENSG00000224116.5	INHBA-AS1	antisense	chr7	41693916	41779388	2.78804	0.353308	7.89123	2.99e-15	2e-14
cg19748093	-0.0342149	0.0134878	0.031183	ENSG00000224167.1	RP3-522D1.1, RP11-426L16.8	lincRNA	chr1	112850028	112877871	2.72982	0.217992	12.5226	5.62e-36	1.58e-34
cg22399646	0.144626	1.78e-06	8.8e-06	ENSG00000224272.2	AC114730.3	antisense	chr2	241808312	241812016	-1.07	0.189243	-5.65407	1.57e-08	5.42e-08
cg10553596	0.0636514	0.00017786	0.000637561	ENSG00000224272.2	AC114730.3	antisense	chr2	241808312	241812016	-1.07	0.189243	-5.65407	1.57e-08	5.42e-08
cg25030832	0.0626725	9.82e-05	0.000369353	ENSG00000224272.2	AC114730.3	antisense	chr2	241808312	241812016	-1.07	0.189243	-5.65407	1.57e-08	5.42e-08
cg20791593	0.0590927	2.89e-05	0.000119255	ENSG00000224272.2	AC114730.3	antisense	chr2	241808312	241812016	-1.07	0.189243	-5.65407	1.57e-08	5.42e-08
cg23501005	-0.12584	8.3e-08	4.93e-07	ENSG00000224652.1	LINC00885	lincRNA	chr3	196142636	196160890	2.42722	0.434724	5.58336	2.36e-08	7.97e-08
cg15578332	-0.1199	1.21e-06	6.13e-06	ENSG00000224652.1	LINC00885	lincRNA	chr3	196142636	196160890	2.42722	0.434724	5.58336	2.36e-08	7.97e-08
cg14371590	0.105316	2.94e-05	0.000120974	ENSG00000224713.4	AC025165.8	antisense	chr12	57612118	57619638	-1.43823	0.250226	-5.74773	9.05e-09	3.2e-08
cg12615879	0.0929493	0.000396501	0.00133068	ENSG00000224713.4	AC025165.8	antisense	chr12	57612118	57619638	-1.43823	0.250226	-5.74773	9.05e-09	3.2e-08
cg26785896	0.0657934	0.0115824	0.0273145	ENSG00000224713.4	AC025165.8	antisense	chr12	57612118	57619638	-1.43823	0.250226	-5.74773	9.05e-09	3.2e-08
cg08244443	0.0631604	0.0125386	0.0292706	ENSG00000224713.4	AC025165.8	antisense	chr12	57612118	57619638	-1.43823	0.250226	-5.74773	9.05e-09	3.2e-08
cg07580831	-0.227575	1.77e-17	2.98e-16	ENSG00000224879.1	AC011754.1	sense_overlapping	chr2	79158374	79185523	4.81647	0.849299	5.67111	1.42e-08	4.92e-08
cg15692837	-0.181517	4.16e-13	4.53e-12	ENSG00000224879.1	AC011754.1	sense_overlapping	chr2	79158374	79185523	4.81647	0.849299	5.67111	1.42e-08	4.92e-08
cg16158220	-0.117641	4.55e-06	2.13e-05	ENSG00000224879.1	AC011754.1	sense_overlapping	chr2	79158374	79185523	4.81647	0.849299	5.67111	1.42e-08	4.92e-08
cg04493931	0.255828	1.47e-08	9.6e-08	ENSG00000224905.5	AP001347.6	antisense	chr21	14027421	14144468	-1.24333	0.238439	-5.21445	1.84e-07	5.59e-07
cg16983817	0.251063	7.15e-09	4.86e-08	ENSG00000224905.5	AP001347.6	antisense	chr21	14027421	14144468	-1.24333	0.238439	-5.21445	1.84e-07	5.59e-07
cg02767539	0.149468	1.3e-08	8.55e-08	ENSG00000224905.5	AP001347.6	antisense	chr21	14027421	14144468	-1.24333	0.238439	-5.21445	1.84e-07	5.59e-07
cg14303187	-0.130656	1.52e-05	6.55e-05	ENSG00000224945.1	RP11-82L18.2	sense_intronic	chr9	89088604	89109934	2.6012	0.217288	11.9712	5.03e-33	1.16e-31
cg02379784	-0.0695273	0.00301201	0.00832485	ENSG00000225138.6	CTD-2228K2.7	processed_transcript	chr5	473236	480884	1.62904	0.229367	7.10231	1.23e-12	6.44e-12
cg10902033	-0.0651655	0.000264215	0.000917129	ENSG00000225138.6	CTD-2228K2.7	processed_transcript	chr5	473236	480884	1.62904	0.229367	7.10231	1.23e-12	6.44e-12
cg18329423	-0.0558573	0.00162548	0.00478683	ENSG00000225138.6	CTD-2228K2.7	processed_transcript	chr5	473236	480884	1.62904	0.229367	7.10231	1.23e-12	6.44e-12
cg01572653	0.0871588	0.000524311	0.00171662	ENSG00000225194.2	LINC00092	lincRNA	chr9	96019732	96027965	-2.62715	0.175965	-14.93	2.1e-50	1.45e-48
cg14363469	0.0483556	7.98e-05	0.000305051	ENSG00000225194.2	LINC00092	lincRNA	chr9	96019732	96027965	-2.62715	0.175965	-14.93	2.1e-50	1.45e-48
cg15104484	0.00403642	0.018682	0.0413107	ENSG00000225335.3	XXbac-B476C20.9	antisense	chr22	18076527	18078884	-2.48564	0.118302	-21.011	5.2e-98	2.87e-95
cg18404974	0.00200211	0.00091706	0.00285475	ENSG00000225335.3	XXbac-B476C20.9	antisense	chr22	18076527	18078884	-2.48564	0.118302	-21.011	5.2e-98	2.87e-95
cg14508358	-0.0843196	0.00855011	0.0209724	ENSG00000225489.5	RP11-390F4.3	lincRNA	chr9	6716495	6727438	1.16572	0.194991	5.97831	2.25e-09	8.53e-09
cg04332163	-0.062791	0.00477343	0.0125431	ENSG00000225489.5	RP11-390F4.3	lincRNA	chr9	6716495	6727438	1.16572	0.194991	5.97831	2.25e-09	8.53e-09
cg01392062	-0.017878	0.0129889	0.030176	ENSG00000225489.5	RP11-390F4.3	lincRNA	chr9	6716495	6727438	1.16572	0.194991	5.97831	2.25e-09	8.53e-09
cg18969117	-0.0317262	0.0132837	0.0307716	ENSG00000225518.2	RP11-396C23.2	lincRNA	chr1	226083639	226090292	1.66153	0.176361	9.42118	4.46e-21	4.65e-20
cg18454863	0.125047	1.18e-09	8.82e-09	ENSG00000225655.4	PGM5-AS1	antisense	chr9	41073710	41076392	-4.58814	0.478054	-9.59752	8.19e-22	8.97e-21
cg27196842	0.0760279	1.53e-05	6.6e-05	ENSG00000225655.4	PGM5-AS1	antisense	chr9	41073710	41076392	-4.58814	0.478054	-9.59752	8.19e-22	8.97e-21
cg00872354	-0.0309315	0.0210957	0.0458532	ENSG00000225680.1	AL163953.2	lincRNA	chr14	53599832	53614026	3.68621	0.266479	13.833	1.61e-43	7.38e-42
cg08721840	-0.00670316	0.0176796	0.0393934	ENSG00000225855.5	RUSC1-AS1	antisense	chr1	155316863	155324176	1.35652	0.161098	8.42045	3.75e-17	2.93e-16
cg17386265	0.425616	1.41e-22	3.83e-21	ENSG00000226031.4	FGF13-AS1	antisense	chrX	138711452	138716617	-1.55601	0.550154	-2.82833	0.00467922	0.00746644
cg24401557	0.384388	3.86e-22	1e-20	ENSG00000226031.4	FGF13-AS1	antisense	chrX	138711452	138716617	-1.55601	0.550154	-2.82833	0.00467922	0.00746644
cg05196026	0.344979	4.91e-24	1.52e-22	ENSG00000226031.4	FGF13-AS1	antisense	chrX	138711452	138716617	-1.55601	0.550154	-2.82833	0.00467922	0.00746644
cg25645840	0.335981	1.21e-20	2.72e-19	ENSG00000226031.4	FGF13-AS1	antisense	chrX	138711452	138716617	-1.55601	0.550154	-2.82833	0.00467922	0.00746644
cg04474375	0.306127	4.11e-20	8.82e-19	ENSG00000226031.4	FGF13-AS1	antisense	chrX	138711452	138716617	-1.55601	0.550154	-2.82833	0.00467922	0.00746644
cg20271300	0.298835	1.14e-18	2.15e-17	ENSG00000226031.4	FGF13-AS1	antisense	chrX	138711452	138716617	-1.55601	0.550154	-2.82833	0.00467922	0.00746644
cg26950467	0.293308	5.89e-11	5.09e-10	ENSG00000226031.4	FGF13-AS1	antisense	chrX	138711452	138716617	-1.55601	0.550154	-2.82833	0.00467922	0.00746644
cg06525551	0.281811	4.95e-15	6.54e-14	ENSG00000226031.4	FGF13-AS1	antisense	chrX	138711452	138716617	-1.55601	0.550154	-2.82833	0.00467922	0.00746644
cg21040569	0.272911	1.08e-19	2.23e-18	ENSG00000226031.4	FGF13-AS1	antisense	chrX	138711452	138716617	-1.55601	0.550154	-2.82833	0.00467922	0.00746644
cg06711837	0.244183	2.03e-19	4.09e-18	ENSG00000226031.4	FGF13-AS1	antisense	chrX	138711452	138716617	-1.55601	0.550154	-2.82833	0.00467922	0.00746644
cg08791697	0.216304	1e-08	6.66e-08	ENSG00000226031.4	FGF13-AS1	antisense	chrX	138711452	138716617	-1.55601	0.550154	-2.82833	0.00467922	0.00746644
cg24980440	0.148021	9.12e-06	4.07e-05	ENSG00000226031.4	FGF13-AS1	antisense	chrX	138711452	138716617	-1.55601	0.550154	-2.82833	0.00467922	0.00746644
cg07342108	-0.0997318	1.85e-05	7.88e-05	ENSG00000226235.1	LEMD1-AS1	antisense	chr1	205373252	205387440	3.96129	0.461771	8.57847	9.61e-18	7.82e-17
cg08473693	-0.0495066	0.0153456	0.0348679	ENSG00000226235.1	LEMD1-AS1	antisense	chr1	205373252	205387440	3.96129	0.461771	8.57847	9.61e-18	7.82e-17
cg13848566	0.105351	0.000313324	0.00107253	ENSG00000226237.1	RP11-276H19.1	lincRNA	chr9	86948699	87002033	-2.29413	0.330523	-6.94091	3.9e-12	1.94e-11
cg00636641	0.0693809	0.0112645	0.0266594	ENSG00000226237.1	RP11-276H19.1	lincRNA	chr9	86948699	87002033	-2.29413	0.330523	-6.94091	3.9e-12	1.94e-11
cg21842689	-0.189712	1.84e-19	3.72e-18	ENSG00000226332.2	RP11-157P1.4	antisense	chr20	62305432	62306325	1.49988	0.153617	9.76377	1.61e-22	1.85e-21
cg08178815	-0.17475	1.03e-08	6.83e-08	ENSG00000226332.2	RP11-157P1.4	antisense	chr20	62305432	62306325	1.49988	0.153617	9.76377	1.61e-22	1.85e-21
cg00940514	-0.0385537	0.00965182	0.0232998	ENSG00000226332.2	RP11-157P1.4	antisense	chr20	62305432	62306325	1.49988	0.153617	9.76377	1.61e-22	1.85e-21
cg11299980	-0.240478	7.19e-14	8.46e-13	ENSG00000226644.4	RP11-128M1.1	lincRNA	chr20	2207217	2213151	2.6023	0.259279	10.0367	1.05e-23	1.33e-22
cg24082384	-0.0774913	0.00140762	0.00420513	ENSG00000226674.7	TEX41	lincRNA	chr2	144667967	145262988	2.20242	0.347687	6.33449	2.38e-10	1e-09
cg23792485	-0.160779	1.09e-09	8.18e-09	ENSG00000226812.2	RP5-881L22.5	antisense	chr20	44347552	44355185	1.87496	0.223616	8.38474	5.08e-17	3.93e-16
cg06640637	-0.145538	9.79e-10	7.38e-09	ENSG00000226812.2	RP5-881L22.5	antisense	chr20	44347552	44355185	1.87496	0.223616	8.38474	5.08e-17	3.93e-16
cg20848979	-0.138213	8.43e-10	6.41e-09	ENSG00000226812.2	RP5-881L22.5	antisense	chr20	44347552	44355185	1.87496	0.223616	8.38474	5.08e-17	3.93e-16
cg08314996	-0.117668	1.56e-09	1.15e-08	ENSG00000226812.2	RP5-881L22.5	antisense	chr20	44347552	44355185	1.87496	0.223616	8.38474	5.08e-17	3.93e-16
cg24084358	-0.113618	4.12e-09	2.88e-08	ENSG00000226812.2	RP5-881L22.5	antisense	chr20	44347552	44355185	1.87496	0.223616	8.38474	5.08e-17	3.93e-16
cg06126829	-0.111654	2.24e-10	1.81e-09	ENSG00000226812.2	RP5-881L22.5	antisense	chr20	44347552	44355185	1.87496	0.223616	8.38474	5.08e-17	3.93e-16
cg16221969	-0.109111	3.25e-10	2.59e-09	ENSG00000226812.2	RP5-881L22.5	antisense	chr20	44347552	44355185	1.87496	0.223616	8.38474	5.08e-17	3.93e-16
cg23834593	-0.106601	2.12e-09	1.53e-08	ENSG00000226812.2	RP5-881L22.5	antisense	chr20	44347552	44355185	1.87496	0.223616	8.38474	5.08e-17	3.93e-16
cg22958104	-0.0898676	1.2e-10	1e-09	ENSG00000226812.2	RP5-881L22.5	antisense	chr20	44347552	44355185	1.87496	0.223616	8.38474	5.08e-17	3.93e-16
cg16121136	-0.0879056	1.81e-08	1.17e-07	ENSG00000226812.2	RP5-881L22.5	antisense	chr20	44347552	44355185	1.87496	0.223616	8.38474	5.08e-17	3.93e-16
cg21081369	-0.0847076	3.3e-08	2.07e-07	ENSG00000226812.2	RP5-881L22.5	antisense	chr20	44347552	44355185	1.87496	0.223616	8.38474	5.08e-17	3.93e-16
cg04281261	-0.155679	1.08e-07	6.34e-07	ENSG00000226995.6	LINC00658, RP5-828H9.1	lincRNA	chr20	5426895	5471094	3.59127	0.509297	7.05141	1.77e-12	9.16e-12
cg07833342	-0.148638	4.97e-09	3.45e-08	ENSG00000226995.6	LINC00658, RP5-828H9.1	lincRNA	chr20	5426895	5471094	3.59127	0.509297	7.05141	1.77e-12	9.16e-12
cg06182261	-0.0906745	6.48e-05	0.000251588	ENSG00000226995.6	LINC00658, RP5-828H9.1	lincRNA	chr20	5426895	5471094	3.59127	0.509297	7.05141	1.77e-12	9.16e-12
cg01234012	-0.0851052	0.000453348	0.00150377	ENSG00000226995.6	LINC00658, RP5-828H9.1	lincRNA	chr20	5426895	5471094	3.59127	0.509297	7.05141	1.77e-12	9.16e-12
cg17616099	-0.0423855	0.0101376	0.0243198	ENSG00000226995.6	LINC00658, RP5-828H9.1	lincRNA	chr20	5426895	5471094	3.59127	0.509297	7.05141	1.77e-12	9.16e-12
cg14574088	-0.0121179	0.019339	0.0425581	ENSG00000226995.6	LINC00658, RP5-828H9.1	lincRNA	chr20	5426895	5471094	3.59127	0.509297	7.05141	1.77e-12	9.16e-12
cg23589045	0.00199677	0.0115701	0.0272891	ENSG00000227070.1	RP11-191G24.1	antisense	chr1	51518309	51561629	-1.07922	0.159656	-6.75964	1.38e-11	6.56e-11
cg15472784	0.22413	5.16e-16	7.54e-15	ENSG00000227372.9	TP73-AS1	antisense	chr1	3735601	3747336	-1.61639	0.169611	-9.52996	1.57e-21	1.7e-20
cg24934561	0.204781	8.68e-11	7.36e-10	ENSG00000227372.9	TP73-AS1	antisense	chr1	3735601	3747336	-1.61639	0.169611	-9.52996	1.57e-21	1.7e-20
cg01793449	0.181168	3.01e-10	2.41e-09	ENSG00000227372.9	TP73-AS1	antisense	chr1	3735601	3747336	-1.61639	0.169611	-9.52996	1.57e-21	1.7e-20
cg10634619	0.173024	4.08e-13	4.45e-12	ENSG00000227372.9	TP73-AS1	antisense	chr1	3735601	3747336	-1.61639	0.169611	-9.52996	1.57e-21	1.7e-20
cg05491852	0.172992	1.95e-09	1.42e-08	ENSG00000227372.9	TP73-AS1	antisense	chr1	3735601	3747336	-1.61639	0.169611	-9.52996	1.57e-21	1.7e-20
cg11253879	0.129208	3.19e-07	1.75e-06	ENSG00000227372.9	TP73-AS1	antisense	chr1	3735601	3747336	-1.61639	0.169611	-9.52996	1.57e-21	1.7e-20
cg23666378	0.125575	2.54e-18	4.62e-17	ENSG00000227372.9	TP73-AS1	antisense	chr1	3735601	3747336	-1.61639	0.169611	-9.52996	1.57e-21	1.7e-20
cg03909781	0.10696	0.000339133	0.00115301	ENSG00000227372.9	TP73-AS1	antisense	chr1	3735601	3747336	-1.61639	0.169611	-9.52996	1.57e-21	1.7e-20
cg03609308	0.0650664	8.87e-06	3.97e-05	ENSG00000227372.9	TP73-AS1	antisense	chr1	3735601	3747336	-1.61639	0.169611	-9.52996	1.57e-21	1.7e-20
cg05802386	-0.0561538	0.00510033	0.013302	ENSG00000227533.4	SLC2A1-AS1	lincRNA	chr1	42959049	42983358	1.35009	0.222173	6.07677	1.23e-09	4.78e-09
cg03796659	-0.0278136	0.00521824	0.013575	ENSG00000227542.1	AC092614.2	lincRNA	chr2	191229165	191246172	1.72109	0.167877	10.2521	1.16e-24	1.57e-23
cg22579218	0.00680326	0.00918996	0.0223244	ENSG00000228113.6	AC003991.3	antisense	chr7	88219359	88304367	-1.3109	0.287562	-4.55867	5.15e-06	1.3e-05
cg05532669	0.00648187	0.000257063	0.000894389	ENSG00000228113.6	AC003991.3	antisense	chr7	88219359	88304367	-1.3109	0.287562	-4.55867	5.15e-06	1.3e-05
cg26644764	0.00475648	0.00233514	0.00663002	ENSG00000228113.6	AC003991.3	antisense	chr7	88219359	88304367	-1.3109	0.287562	-4.55867	5.15e-06	1.3e-05
cg17273416	-0.0744357	0.0140189	0.0322473	ENSG00000228630.4	HOTAIR	antisense	chr12	53962308	53974956	3.22762	0.553023	5.83632	5.34e-09	1.94e-08
cg04203883	-0.0435018	0.0125753	0.0293448	ENSG00000228630.4	HOTAIR	antisense	chr12	53962308	53974956	3.22762	0.553023	5.83632	5.34e-09	1.94e-08
cg07787450	-0.0675157	0.0105466	0.0251772	ENSG00000228705.1	LINC00659	antisense	chr20	62774128	62775412	6.24836	0.354056	17.6479	1.06e-69	2.11e-67
cg12405742	0.176759	2.89e-05	0.000119141	ENSG00000228791.6	THRB-AS1	processed_transcript	chr3	24494087	24681711	-1.22675	0.267835	-4.58025	4.64e-06	1.18e-05
cg13518327	0.112672	0.000445202	0.00147937	ENSG00000228791.6	THRB-AS1	processed_transcript	chr3	24494087	24681711	-1.22675	0.267835	-4.58025	4.64e-06	1.18e-05
cg09805010	0.108295	0.00303471	0.00838129	ENSG00000228791.6	THRB-AS1	processed_transcript	chr3	24494087	24681711	-1.22675	0.267835	-4.58025	4.64e-06	1.18e-05
cg00688963	0.0782982	0.0178559	0.0397237	ENSG00000228791.6	THRB-AS1	processed_transcript	chr3	24494087	24681711	-1.22675	0.267835	-4.58025	4.64e-06	1.18e-05
cg02333852	0.0782508	0.0111515	0.0264262	ENSG00000228791.6	THRB-AS1	processed_transcript	chr3	24494087	24681711	-1.22675	0.267835	-4.58025	4.64e-06	1.18e-05
cg15385623	0.0431515	0.01836	0.040694	ENSG00000228791.6	THRB-AS1	processed_transcript	chr3	24494087	24681711	-1.22675	0.267835	-4.58025	4.64e-06	1.18e-05
cg12360736	0.0808509	0.00127076	0.00383446	ENSG00000229619.3	MBNL1-AS1	antisense	chr3	152262616	152269555	-2.65931	0.196585	-13.5275	1.08e-41	4.34e-40
cg25165701	0.0338961	0.0158342	0.0358257	ENSG00000229619.3	MBNL1-AS1	antisense	chr3	152262616	152269555	-2.65931	0.196585	-13.5275	1.08e-41	4.34e-40
cg15862923	0.00677465	0.00104479	0.00321208	ENSG00000229619.3	MBNL1-AS1	antisense	chr3	152262616	152269555	-2.65931	0.196585	-13.5275	1.08e-41	4.34e-40
cg21588307	0.00646473	0.000161989	0.000585055	ENSG00000229619.3	MBNL1-AS1	antisense	chr3	152262616	152269555	-2.65931	0.196585	-13.5275	1.08e-41	4.34e-40
cg06158244	0.00640144	0.0087146	0.0213267	ENSG00000229619.3	MBNL1-AS1	antisense	chr3	152262616	152269555	-2.65931	0.196585	-13.5275	1.08e-41	4.34e-40
cg16379704	-0.101849	2.43e-18	4.43e-17	ENSG00000229970.3	AC007009.1, AC007128.1	antisense	chr7	8262264	8344516	4.87036	0.276694	17.6019	2.38e-69	4.61e-67
cg20641531	-0.0835798	0.00782057	0.0193992	ENSG00000229970.3	AC007009.1, AC007128.1	antisense	chr7	8262264	8344516	4.87036	0.276694	17.6019	2.38e-69	4.61e-67
cg05822926	-0.0797257	2.16e-18	3.95e-17	ENSG00000229970.3	AC007009.1, AC007128.1	antisense	chr7	8262264	8344516	4.87036	0.276694	17.6019	2.38e-69	4.61e-67
cg20371765	-0.0591782	3.81e-16	5.64e-15	ENSG00000229970.3	AC007009.1, AC007128.1	antisense	chr7	8262264	8344516	4.87036	0.276694	17.6019	2.38e-69	4.61e-67
cg10798171	-0.0370535	6.72e-14	7.93e-13	ENSG00000229970.3	AC007009.1, AC007128.1	antisense	chr7	8262264	8344516	4.87036	0.276694	17.6019	2.38e-69	4.61e-67
cg00030291	-0.0224082	0.00393336	0.0105612	ENSG00000229970.3	AC007009.1, AC007128.1	antisense	chr7	8262264	8344516	4.87036	0.276694	17.6019	2.38e-69	4.61e-67
cg00507727	-0.0111668	3.92e-05	0.000158021	ENSG00000229970.3	AC007009.1, AC007128.1	antisense	chr7	8262264	8344516	4.87036	0.276694	17.6019	2.38e-69	4.61e-67
cg20977170	-0.00475047	1.01e-06	5.19e-06	ENSG00000229970.3	AC007009.1, AC007128.1	antisense	chr7	8262264	8344516	4.87036	0.276694	17.6019	2.38e-69	4.61e-67
cg20647467	-0.0249669	0.000144549	0.000526971	ENSG00000230316.5	FEZF1-AS1	antisense	chr7	122303658	122310077	9.24683	0.473392	19.5331	5.74e-85	2.12e-82
cg14627743	-0.0113335	0.000184985	0.000661197	ENSG00000230316.5	FEZF1-AS1	antisense	chr7	122303658	122310077	9.24683	0.473392	19.5331	5.74e-85	2.12e-82
cg10103000	-0.331427	1.49e-19	3.04e-18	ENSG00000230426.2	ERVMER61-1	lincRNA	chr1	187641226	187643860	6.44689	0.836462	7.70733	1.28e-14	8.15e-14
cg16222802	-0.0795394	0.000942215	0.00292508	ENSG00000230454.1	U73166.2	lincRNA	chr3	50260303	50263358	1.58121	0.194699	8.12132	4.61e-16	3.3e-15
cg17954152	-0.0281517	0.00717725	0.0179874	ENSG00000230461.7	PROX1-AS1	processed_transcript	chr1	213817751	213988508	2.02897	0.222903	9.1025	8.83e-20	8.43e-19
cg23260547	-0.00718314	0.00017446	0.000626263	ENSG00000230461.7	PROX1-AS1	processed_transcript	chr1	213817751	213988508	2.02897	0.222903	9.1025	8.83e-20	8.43e-19
cg23322242	-0.177054	1.33e-59	1.11e-56	ENSG00000230479.1	AP000695.6	antisense	chr21	36430360	36481070	1.89764	0.243271	7.80053	6.16e-15	4.01e-14
ch.21.36723363F	-0.0125694	0.00204792	0.00589331	ENSG00000230479.1	AP000695.6	antisense	chr21	36430360	36481070	1.89764	0.243271	7.80053	6.16e-15	4.01e-14
cg19098793	0.00902615	0.0113994	0.0269396	ENSG00000230487.6	PSMG3-AS1	lincRNA	chr7	1570073	1589626	-1.06176	0.125986	-8.42764	3.53e-17	2.75e-16
cg01782097	-0.0348945	0.00736056	0.0183937	ENSG00000230699.2	RP11-54O7.1	lincRNA	chr1	911435	914948	2.74413	0.395157	6.94442	3.8e-12	1.9e-11
cg01964562	-0.147588	9.39e-09	6.28e-08	ENSG00000230725.4	RP4-738P15.1	lincRNA	chr20	25140789	25149258	3.23045	0.572589	5.64184	1.68e-08	5.79e-08
cg04377618	-0.0938683	8.8e-07	4.55e-06	ENSG00000230725.4	RP4-738P15.1	lincRNA	chr20	25140789	25149258	3.23045	0.572589	5.64184	1.68e-08	5.79e-08
cg02525307	-0.0355649	0.000114241	0.000424527	ENSG00000231081.1	RP4-760C5.3	lincRNA	chr20	26008791	26010531	2.64971	0.30406	8.71445	2.92e-18	2.48e-17
cg21995068	-0.0333091	0.0160344	0.0362151	ENSG00000231081.1	RP4-760C5.3	lincRNA	chr20	26008791	26010531	2.64971	0.30406	8.71445	2.92e-18	2.48e-17
cg01429032	-0.0214456	0.0227711	0.04896	ENSG00000231081.1	RP4-760C5.3	lincRNA	chr20	26008791	26010531	2.64971	0.30406	8.71445	2.92e-18	2.48e-17
cg24393055	-0.0222248	6.16e-05	0.000240012	ENSG00000231185.5	AC005592.2	antisense	chr5	142325293	142672001	3.2346	0.236089	13.7007	1.01e-42	4.35e-41
cg27015057	-0.00794879	5.37e-05	0.000211412	ENSG00000231185.5	AC005592.2	antisense	chr5	142325293	142672001	3.2346	0.236089	13.7007	1.01e-42	4.35e-41
cg14619259	-0.00774654	0.00306599	0.0084584	ENSG00000231185.5	AC005592.2	antisense	chr5	142325293	142672001	3.2346	0.236089	13.7007	1.01e-42	4.35e-41
cg27282922	0.0425871	0.000223711	0.000787318	ENSG00000231419.5	LINC00689	processed_transcript	chr7	159006522	159030195	-1.3426	0.324737	-4.13443	3.56e-05	7.99e-05
cg26362605	-0.145723	2.31e-10	1.87e-09	ENSG00000231720.1	RP11-568A7.3, RP11-568A7.2	lincRNA	chr6	167237508	167240480	2.25192	0.406151	5.54455	2.95e-08	9.86e-08
cg06525798	-0.0729366	0.00511577	0.0133378	ENSG00000231720.1	RP11-568A7.3, RP11-568A7.2	lincRNA	chr6	167237508	167240480	2.25192	0.406151	5.54455	2.95e-08	9.86e-08
cg17962047	-0.0470058	7.38e-05	0.000283977	ENSG00000231720.1	RP11-568A7.3, RP11-568A7.2	lincRNA	chr6	167237508	167240480	2.25192	0.406151	5.54455	2.95e-08	9.86e-08
cg02365780	-0.0724274	0.0228602	0.0491276	ENSG00000232034.1	AC092168.2	sense_intronic	chr2	100822661	100847220	2.63749	0.396476	6.65233	2.88e-11	1.33e-10
cg03909509	-0.0179255	0.00025578	0.00089023	ENSG00000232034.1	AC092168.2	sense_intronic	chr2	100822661	100847220	2.63749	0.396476	6.65233	2.88e-11	1.33e-10
cg24221947	-0.00877207	7.24e-08	4.34e-07	ENSG00000232034.1	AC092168.2	sense_intronic	chr2	100822661	100847220	2.63749	0.396476	6.65233	2.88e-11	1.33e-10
cg13967888	0.0938376	6.06e-09	4.15e-08	ENSG00000232063.1	RP11-307E17.8	lincRNA	chr9	94332476	94360948	-1.14269	0.221918	-5.14913	2.62e-07	7.81e-07
cg03828745	0.046705	0.00208671	0.00599417	ENSG00000232063.1	RP11-307E17.8	lincRNA	chr9	94332476	94360948	-1.14269	0.221918	-5.14913	2.62e-07	7.81e-07
cg12720965	-0.14464	9.84e-07	5.06e-06	ENSG00000232192.1	RP11-62I21.1	antisense	chr1	245206444	245234501	4.39553	0.673333	6.52802	6.66e-11	2.96e-10
cg25407736	0.133893	1.27e-06	6.43e-06	ENSG00000232284.6	GNG12-AS1	antisense	chr1	67832303	68202987	-1.31847	0.183764	-7.17481	7.24e-13	3.9e-12
cg14512363	0.00447527	0.00939146	0.0227511	ENSG00000232284.6	GNG12-AS1	antisense	chr1	67832303	68202987	-1.31847	0.183764	-7.17481	7.24e-13	3.9e-12
cg10927510	-0.00900415	0.00233086	0.00661882	ENSG00000232442.1	CTD-3184A7.4	antisense	chr20	63627227	63628824	1.7928	0.150468	11.9149	9.9e-33	2.25e-31
cg00271177	-0.0636774	0.0164701	0.0370596	ENSG00000232874.1	RP11-135A1.2	antisense	chr3	194130616	194131201	1.31486	0.204788	6.42061	1.36e-10	5.86e-10
cg16459265	-0.10261	0.00103395	0.00318167	ENSG00000232956.7	SNHG15	lincRNA	chr7	44983023	44986961	1.81321	0.103186	17.5722	4.02e-69	7.66e-67
cg00762623	-0.00999854	0.0178997	0.0398081	ENSG00000232956.7	SNHG15	lincRNA	chr7	44983023	44986961	1.81321	0.103186	17.5722	4.02e-69	7.66e-67
cg00953154	-0.00742819	0.0167511	0.037602	ENSG00000232956.7	SNHG15	lincRNA	chr7	44983023	44986961	1.81321	0.103186	17.5722	4.02e-69	7.66e-67
cg16439198	0.43029	9.7e-40	1.38e-37	ENSG00000232973.10	CYP1B1-AS1	antisense	chr2	38073447	38231651	-1.56747	0.212904	-7.36232	1.81e-13	1.03e-12
cg07078841	0.427572	2.42e-25	8.57e-24	ENSG00000232973.10	CYP1B1-AS1	antisense	chr2	38073447	38231651	-1.56747	0.212904	-7.36232	1.81e-13	1.03e-12
cg18451022	0.39813	3.17e-23	9.11e-22	ENSG00000232973.10	CYP1B1-AS1	antisense	chr2	38073447	38231651	-1.56747	0.212904	-7.36232	1.81e-13	1.03e-12
cg23151000	0.385203	3.6e-36	3.63e-34	ENSG00000232973.10	CYP1B1-AS1	antisense	chr2	38073447	38231651	-1.56747	0.212904	-7.36232	1.81e-13	1.03e-12
cg25856383	0.32665	3.05e-16	4.56e-15	ENSG00000232973.10	CYP1B1-AS1	antisense	chr2	38073447	38231651	-1.56747	0.212904	-7.36232	1.81e-13	1.03e-12
cg11751707	0.317259	1.89e-41	3.11e-39	ENSG00000232973.10	CYP1B1-AS1	antisense	chr2	38073447	38231651	-1.56747	0.212904	-7.36232	1.81e-13	1.03e-12
cg03890222	0.252274	7.17e-26	2.67e-24	ENSG00000232973.10	CYP1B1-AS1	antisense	chr2	38073447	38231651	-1.56747	0.212904	-7.36232	1.81e-13	1.03e-12
cg20254225	0.250177	3.76e-26	1.44e-24	ENSG00000232973.10	CYP1B1-AS1	antisense	chr2	38073447	38231651	-1.56747	0.212904	-7.36232	1.81e-13	1.03e-12
cg09799983	0.244373	1.38e-29	7.36e-28	ENSG00000232973.10	CYP1B1-AS1	antisense	chr2	38073447	38231651	-1.56747	0.212904	-7.36232	1.81e-13	1.03e-12
cg06264984	0.180644	3.08e-22	8.08e-21	ENSG00000232973.10	CYP1B1-AS1	antisense	chr2	38073447	38231651	-1.56747	0.212904	-7.36232	1.81e-13	1.03e-12
cg01410359	0.113551	5.59e-13	6e-12	ENSG00000232973.10	CYP1B1-AS1	antisense	chr2	38073447	38231651	-1.56747	0.212904	-7.36232	1.81e-13	1.03e-12
cg00565882	0.112966	1.75e-09	1.28e-08	ENSG00000232973.10	CYP1B1-AS1	antisense	chr2	38073447	38231651	-1.56747	0.212904	-7.36232	1.81e-13	1.03e-12
cg07057636	0.083002	0.00106888	0.00327936	ENSG00000232973.10	CYP1B1-AS1	antisense	chr2	38073447	38231651	-1.56747	0.212904	-7.36232	1.81e-13	1.03e-12
cg16060486	0.0444126	0.0149503	0.0340856	ENSG00000232973.10	CYP1B1-AS1	antisense	chr2	38073447	38231651	-1.56747	0.212904	-7.36232	1.81e-13	1.03e-12
cg00396865	-0.0674694	0.00383898	0.0103349	ENSG00000233016.5	SNHG7	antisense	chr9	136721366	136728184	1.29045	0.131337	9.82547	8.75e-23	1.02e-21
cg17976205	-0.12047	2.3e-09	1.66e-08	ENSG00000233017.2	RP5-908M14.5	antisense	chr20	62427827	62447621	3.91657	0.298827	13.1065	3.02e-39	1.06e-37
cg02537838	-0.109343	7.11e-10	5.45e-09	ENSG00000233017.2	RP5-908M14.5	antisense	chr20	62427827	62447621	3.91657	0.298827	13.1065	3.02e-39	1.06e-37
cg03359095	-0.101787	1.89e-09	1.38e-08	ENSG00000233017.2	RP5-908M14.5	antisense	chr20	62427827	62447621	3.91657	0.298827	13.1065	3.02e-39	1.06e-37
cg13290149	-0.0927508	2.74e-11	2.45e-10	ENSG00000233017.2	RP5-908M14.5	antisense	chr20	62427827	62447621	3.91657	0.298827	13.1065	3.02e-39	1.06e-37
cg00334976	-0.0890345	2.91e-07	1.61e-06	ENSG00000233017.2	RP5-908M14.5	antisense	chr20	62427827	62447621	3.91657	0.298827	13.1065	3.02e-39	1.06e-37
cg06154311	-0.0860416	4.67e-07	2.51e-06	ENSG00000233017.2	RP5-908M14.5	antisense	chr20	62427827	62447621	3.91657	0.298827	13.1065	3.02e-39	1.06e-37
cg17565967	-0.0743481	4.12e-08	2.54e-07	ENSG00000233017.2	RP5-908M14.5	antisense	chr20	62427827	62447621	3.91657	0.298827	13.1065	3.02e-39	1.06e-37
cg10079867	-0.163415	9.57e-10	7.22e-09	ENSG00000233392.4	AC104809.4	processed_transcript	chr2	240954617	240967451	3.44377	0.436358	7.89207	2.97e-15	1.99e-14
cg26818257	-0.0829819	4.98e-06	2.32e-05	ENSG00000233392.4	AC104809.4	processed_transcript	chr2	240954617	240967451	3.44377	0.436358	7.89207	2.97e-15	1.99e-14
cg12525096	-0.0421274	0.00815556	0.0201263	ENSG00000233392.4	AC104809.4	processed_transcript	chr2	240954617	240967451	3.44377	0.436358	7.89207	2.97e-15	1.99e-14
cg04642738	-0.0294362	0.0107335	0.0255687	ENSG00000233392.4	AC104809.4	processed_transcript	chr2	240954617	240967451	3.44377	0.436358	7.89207	2.97e-15	1.99e-14
cg23656612	-0.0191814	0.01387	0.0319484	ENSG00000233392.4	AC104809.4	processed_transcript	chr2	240954617	240967451	3.44377	0.436358	7.89207	2.97e-15	1.99e-14
cg05372727	-0.420264	5.98e-32	3.99e-30	ENSG00000233532.4	LINC00460	lincRNA	chr13	106376563	106378217	7.11771	0.414585	17.1683	4.59e-66	7.47e-64
cg02205193	-0.402317	2.94e-24	9.34e-23	ENSG00000233532.4	LINC00460	lincRNA	chr13	106376563	106378217	7.11771	0.414585	17.1683	4.59e-66	7.47e-64
cg13822911	-0.38219	3.84e-19	7.54e-18	ENSG00000233532.4	LINC00460	lincRNA	chr13	106376563	106378217	7.11771	0.414585	17.1683	4.59e-66	7.47e-64
cg01027209	-0.296103	5.71e-15	7.51e-14	ENSG00000233532.4	LINC00460	lincRNA	chr13	106376563	106378217	7.11771	0.414585	17.1683	4.59e-66	7.47e-64
cg13103143	-0.219231	9.56e-40	1.36e-37	ENSG00000233542.1	RP11-547D24.1	antisense	chr1	2013213	2015530	5.15365	0.389507	13.2312	5.79e-40	2.11e-38
cg00546307	-0.140558	3.83e-07	2.09e-06	ENSG00000233542.1	RP11-547D24.1	antisense	chr1	2013213	2015530	5.15365	0.389507	13.2312	5.79e-40	2.11e-38
cg09021225	-0.110287	2.23e-05	9.36e-05	ENSG00000233542.1	RP11-547D24.1	antisense	chr1	2013213	2015530	5.15365	0.389507	13.2312	5.79e-40	2.11e-38
cg24450073	-0.115009	6.67e-05	0.000258531	ENSG00000233922.2	AL133493.2	lincRNA	chr21	45593654	45603056	2.84461	0.32894	8.6478	5.25e-18	4.36e-17
cg11374368	-0.0499653	3.76e-05	0.000152025	ENSG00000234235.1	BOK-AS1	antisense	chr2	241544403	241558977	4.4302	0.643855	6.88074	5.95e-12	2.92e-11
cg24436906	-0.0453616	2.25e-06	1.1e-05	ENSG00000234235.1	BOK-AS1	antisense	chr2	241544403	241558977	4.4302	0.643855	6.88074	5.95e-12	2.92e-11
cg21117668	-0.0317307	5.61e-09	3.86e-08	ENSG00000234235.1	BOK-AS1	antisense	chr2	241544403	241558977	4.4302	0.643855	6.88074	5.95e-12	2.92e-11
cg05406868	-0.0396432	1.51e-05	6.52e-05	ENSG00000234432.4	RP11-1275H24.3, RP11-1275H24.1	lincRNA	chr7	5426277	5428927	1.25806	0.135457	9.28753	1.58e-20	1.58e-19
cg00148114	-0.0239848	0.00760868	0.0189402	ENSG00000234432.4	RP11-1275H24.3, RP11-1275H24.1	lincRNA	chr7	5426277	5428927	1.25806	0.135457	9.28753	1.58e-20	1.58e-19
cg04324995	-0.0218861	2.03e-05	8.58e-05	ENSG00000234432.4	RP11-1275H24.3, RP11-1275H24.1	lincRNA	chr7	5426277	5428927	1.25806	0.135457	9.28753	1.58e-20	1.58e-19
cg09744759	-0.0171244	0.00366836	0.00992419	ENSG00000234432.4	RP11-1275H24.3, RP11-1275H24.1	lincRNA	chr7	5426277	5428927	1.25806	0.135457	9.28753	1.58e-20	1.58e-19
cg01425666	-0.0149124	0.000692643	0.00221224	ENSG00000234432.4	RP11-1275H24.3, RP11-1275H24.1	lincRNA	chr7	5426277	5428927	1.25806	0.135457	9.28753	1.58e-20	1.58e-19
cg06550177	-0.00856429	0.0187007	0.041346	ENSG00000234432.4	RP11-1275H24.1	lincRNA	chr7	5426277	5428927	1.25806	0.135457	9.28753	1.58e-20	1.58e-19
cg05814135	-0.177797	1.31e-10	1.09e-09	ENSG00000234546.2	RP3-510D11.2	lincRNA	chr1	9182204	9192089	1.37808	0.187551	7.34779	2.02e-13	1.14e-12
cg06704773	-0.0138136	0.0012513	0.00378136	ENSG00000234741.6	GAS5	processed_transcript	chr1	173863900	173868882	1.2782	0.134167	9.52699	1.62e-21	1.74e-20
cg05396044	-0.00610839	0.00759189	0.0189038	ENSG00000234741.6	GAS5	processed_transcript	chr1	173863900	173868882	1.2782	0.134167	9.52699	1.62e-21	1.74e-20
cg07456376	-0.114601	0.000457692	0.00151693	ENSG00000234859.4	AC003958.2	antisense	chr17	41402416	41425049	5.33269	0.602231	8.85489	8.38e-19	7.39e-18
cg19321887	-0.0641963	0.000829269	0.00260501	ENSG00000234859.4	AC003958.2	antisense	chr17	41402416	41425049	5.33269	0.602231	8.85489	8.38e-19	7.39e-18
cg01446571	-0.0448353	0.0158621	0.0358775	ENSG00000234859.4	AC003958.2	antisense	chr17	41402416	41425049	5.33269	0.602231	8.85489	8.38e-19	7.39e-18
cg09094964	0.121646	0.0121384	0.0284598	ENSG00000235049.1	LINC00940	lincRNA	chr12	1929202	1936574	-2.52163	0.307744	-8.19394	2.53e-16	1.85e-15
cg14310533	0.120753	0.000778306	0.00245954	ENSG00000235049.1	LINC00940	lincRNA	chr12	1929202	1936574	-2.52163	0.307744	-8.19394	2.53e-16	1.85e-15
cg21090298	-0.0717982	1.73e-12	1.77e-11	ENSG00000235280.2	MCF2L-AS1	antisense	chr13	112967484	112968824	1.49763	0.176857	8.46803	2.5e-17	1.97e-16
cg08141659	-0.0593044	1.06e-12	1.1e-11	ENSG00000235280.2	MCF2L-AS1	antisense	chr13	112967484	112968824	1.49763	0.176857	8.46803	2.5e-17	1.97e-16
cg14864103	-0.0273056	7.67e-09	5.19e-08	ENSG00000235280.2	MCF2L-AS1	antisense	chr13	112967484	112968824	1.49763	0.176857	8.46803	2.5e-17	1.97e-16
cg15249961	-0.0262512	0.00395157	0.0106032	ENSG00000235280.2	MCF2L-AS1	antisense	chr13	112967484	112968824	1.49763	0.176857	8.46803	2.5e-17	1.97e-16
cg05437446	-0.0198645	1.6e-05	6.88e-05	ENSG00000235280.2	MCF2L-AS1	antisense	chr13	112967484	112968824	1.49763	0.176857	8.46803	2.5e-17	1.97e-16
cg23137531	-0.0139374	1.91e-06	9.44e-06	ENSG00000235280.2	MCF2L-AS1	antisense	chr13	112967484	112968824	1.49763	0.176857	8.46803	2.5e-17	1.97e-16
cg14331619	0.0562041	1.79e-13	2.03e-12	ENSG00000235387.1	LINC00961	lincRNA	chr9	35909483	35911686	-1.26081	0.128313	-9.82599	8.7e-23	1.02e-21
cg07197864	-0.0114906	0.02149	0.0465906	ENSG00000235790.6	RP11-73M7.6, RP11-73M7.9	antisense	chr1	31644049	31660162	1.37124	0.245164	5.59315	2.23e-08	7.56e-08
cg23378074	-0.255759	1.17e-16	1.82e-15	ENSG00000235884.3	LINC00941	lincRNA	chr12	30795681	30802711	4.62355	0.363046	12.7354	3.76e-37	1.14e-35
cg00251973	-0.0603576	0.0160288	0.0362038	ENSG00000235884.3	LINC00941	lincRNA	chr12	30795681	30802711	4.62355	0.363046	12.7354	3.76e-37	1.14e-35
cg02828687	-0.197587	1.63e-12	1.67e-11	ENSG00000235890.2	TSPEAR-AS1	antisense	chr21	44506807	44516575	2.16302	0.285897	7.56573	3.86e-14	2.34e-13
cg23703089	-0.0545751	0.00851861	0.0209053	ENSG00000235890.2	TSPEAR-AS1	antisense	chr21	44506807	44516575	2.16302	0.285897	7.56573	3.86e-14	2.34e-13
cg11600734	-0.139933	8.7e-15	1.12e-13	ENSG00000235947.1	EGOT	lincRNA	chr3	4749192	4751590	2.93285	0.381927	7.6791	1.6e-14	1.01e-13
cg02799411	-0.118822	1.08e-11	1.01e-10	ENSG00000235947.1	EGOT	lincRNA	chr3	4749192	4751590	2.93285	0.381927	7.6791	1.6e-14	1.01e-13
cg05795849	-0.0922906	9.73e-15	1.25e-13	ENSG00000235947.1	EGOT	lincRNA	chr3	4749192	4751590	2.93285	0.381927	7.6791	1.6e-14	1.01e-13
cg14276379	-0.152697	3.63e-06	1.72e-05	ENSG00000236095.1	RP11-49O14.2	sense_intronic	chr9	94900429	94904754	2.92482	0.452126	6.46904	9.86e-11	4.31e-10
cg06972019	-0.286237	1.3e-30	7.62e-29	ENSG00000236269.1	ENO1-IT1, ENO1-AS1	sense_intronic	chr1	8875788	8878007	2.21177	0.350875	6.30357	2.91e-10	1.21e-09
cg18273817	-0.0935301	1.72e-05	7.34e-05	ENSG00000236269.1	ENO1-IT1	sense_intronic	chr1	8875788	8878007	2.21177	0.350875	6.30357	2.91e-10	1.21e-09
cg13432294	-0.0648522	7.84e-12	7.46e-11	ENSG00000236269.1	ENO1-IT1, ENO1-AS1	sense_intronic	chr1	8875788	8878007	2.21177	0.350875	6.30357	2.91e-10	1.21e-09
cg27579953	0.440008	2.27e-43	4.53e-41	ENSG00000236333.3	TRHDE-AS1	processed_transcript	chr12	72253508	72274907	-1.90773	0.493899	-3.86258	0.000112196	0.000232973
cg06622999	0.410871	5.65e-44	1.18e-41	ENSG00000236333.3	TRHDE-AS1	processed_transcript	chr12	72253508	72274907	-1.90773	0.493899	-3.86258	0.000112196	0.000232973
cg13099890	0.392248	1.16e-40	1.78e-38	ENSG00000236333.3	TRHDE-AS1	processed_transcript	chr12	72253508	72274907	-1.90773	0.493899	-3.86258	0.000112196	0.000232973
cg11054631	0.386144	1.81e-38	2.28e-36	ENSG00000236333.3	TRHDE-AS1	processed_transcript	chr12	72253508	72274907	-1.90773	0.493899	-3.86258	0.000112196	0.000232973
cg01030121	0.377713	4.7e-38	5.69e-36	ENSG00000236333.3	TRHDE-AS1	processed_transcript	chr12	72253508	72274907	-1.90773	0.493899	-3.86258	0.000112196	0.000232973
cg00580978	0.375049	5.45e-27	2.27e-25	ENSG00000236333.3	TRHDE-AS1	processed_transcript	chr12	72253508	72274907	-1.90773	0.493899	-3.86258	0.000112196	0.000232973
cg02511156	0.349217	1.37e-37	1.58e-35	ENSG00000236333.3	TRHDE-AS1	processed_transcript	chr12	72253508	72274907	-1.90773	0.493899	-3.86258	0.000112196	0.000232973
cg04640250	0.294213	1.72e-32	1.21e-30	ENSG00000236333.3	TRHDE-AS1	processed_transcript	chr12	72253508	72274907	-1.90773	0.493899	-3.86258	0.000112196	0.000232973
cg09972192	0.241581	2.19e-29	1.15e-27	ENSG00000236333.3	TRHDE-AS1	processed_transcript	chr12	72253508	72274907	-1.90773	0.493899	-3.86258	0.000112196	0.000232973
cg19516457	0.23515	1.97e-16	3e-15	ENSG00000236333.3	TRHDE-AS1	processed_transcript	chr12	72253508	72274907	-1.90773	0.493899	-3.86258	0.000112196	0.000232973
cg13663218	0.232024	6.07e-31	3.68e-29	ENSG00000236333.3	TRHDE-AS1	processed_transcript	chr12	72253508	72274907	-1.90773	0.493899	-3.86258	0.000112196	0.000232973
cg19188182	0.181498	3.1e-15	4.18e-14	ENSG00000236333.3	TRHDE-AS1	processed_transcript	chr12	72253508	72274907	-1.90773	0.493899	-3.86258	0.000112196	0.000232973
cg16002523	-0.0386605	0.0183879	0.0407491	ENSG00000236438.5	FAM157A	lincRNA	chr3	198152366	198170059	2.15695	0.368695	5.85024	4.91e-09	1.79e-08
cg12743638	-0.0615121	0.000768619	0.00243159	ENSG00000236499.2	XXbac-B444P24.8, LINC00896	lincRNA	chr22	20206397	20208524	2.08587	0.22248	9.37555	6.88e-21	7.06e-20
cg07422042	-0.0418681	0.00456799	0.012063	ENSG00000236499.2	LINC00896	lincRNA	chr22	20206397	20208524	2.08587	0.22248	9.37555	6.88e-21	7.06e-20
cg12068069	-0.215711	3.81e-13	4.16e-12	ENSG00000236782.4	RP11-96L14.7	antisense	chr1	26169947	26171821	1.50769	0.221491	6.80702	9.96e-12	4.79e-11
cg15543769	-0.00538301	0.00790053	0.0195732	ENSG00000236782.4	RP11-96L14.7	antisense	chr1	26169947	26171821	1.50769	0.221491	6.80702	9.96e-12	4.79e-11
cg08297751	0.359111	7.43e-32	4.92e-30	ENSG00000237125.7	HAND2-AS1	antisense	chr4	173527270	173591324	-4.38184	0.332749	-13.1686	1.33e-39	4.77e-38
cg10852861	0.291444	3e-21	7.15e-20	ENSG00000237125.7	HAND2-AS1	antisense	chr4	173527270	173591324	-4.38184	0.332749	-13.1686	1.33e-39	4.77e-38
cg05155840	0.276263	3.94e-14	4.76e-13	ENSG00000237125.7	HAND2-AS1	antisense	chr4	173527270	173591324	-4.38184	0.332749	-13.1686	1.33e-39	4.77e-38
cg01967399	0.220584	4.71e-10	3.68e-09	ENSG00000237125.7	HAND2-AS1	antisense	chr4	173527270	173591324	-4.38184	0.332749	-13.1686	1.33e-39	4.77e-38
cg27218796	0.21118	3.32e-15	4.48e-14	ENSG00000237125.7	HAND2-AS1	antisense	chr4	173527270	173591324	-4.38184	0.332749	-13.1686	1.33e-39	4.77e-38
cg04699272	0.197866	1.18e-10	9.83e-10	ENSG00000237125.7	HAND2-AS1	antisense	chr4	173527270	173591324	-4.38184	0.332749	-13.1686	1.33e-39	4.77e-38
cg24974365	0.176616	4.47e-16	6.57e-15	ENSG00000237125.7	HAND2-AS1	antisense	chr4	173527270	173591324	-4.38184	0.332749	-13.1686	1.33e-39	4.77e-38
cg16538531	0.153917	1.82e-10	1.49e-09	ENSG00000237125.7	HAND2-AS1	antisense	chr4	173527270	173591324	-4.38184	0.332749	-13.1686	1.33e-39	4.77e-38
cg10933003	0.115803	3.87e-13	4.23e-12	ENSG00000237125.7	HAND2-AS1	antisense	chr4	173527270	173591324	-4.38184	0.332749	-13.1686	1.33e-39	4.77e-38
cg10414177	-0.199678	3.68e-11	3.25e-10	ENSG00000237152.3	DLEU7-AS1	antisense	chr13	50807856	50849905	2.9312	0.292223	10.0307	1.12e-23	1.41e-22
cg02503527	-0.0291467	0.000174943	0.00062786	ENSG00000237310.1	GS1-124K5.3, GS1-124K5.4	lincRNA	chr7	66493706	66495474	1.2804	0.154134	8.30704	9.81e-17	7.46e-16
cg00130778	-0.169514	6.39e-09	4.36e-08	ENSG00000237517.7	DGCR5	antisense	chr22	18970514	19031242	1.97947	0.289985	6.82611	8.73e-12	4.21e-11
cg05256041	-0.0698985	0.00127507	0.00384593	ENSG00000237517.7	DGCR5	antisense	chr22	18970514	19031242	1.97947	0.289985	6.82611	8.73e-12	4.21e-11
cg00510541	-0.228384	2.84e-12	2.83e-11	ENSG00000237686.5	RP5-1120P11.3, RP5-1120P11.1	antisense	chr6	43995723	44074652	4.61781	0.226718	20.368	3.21e-92	1.49e-89
cg08248751	-0.124145	2.62e-13	2.91e-12	ENSG00000237686.5	RP5-1120P11.1	antisense	chr6	43995723	44074652	4.61781	0.226718	20.368	3.21e-92	1.49e-89
cg04920527	-0.00538006	0.0186099	0.0411727	ENSG00000238279.1	BX470102.3	antisense	chr1	153533603	153535115	2.43593	0.195751	12.444	1.51e-35	4.11e-34
cg03079681	0.112946	1.25e-06	6.32e-06	ENSG00000240498.5	CDKN2B-AS1, RP11-149I2.4	antisense	chr9	21994778	22121097	-5.00644	0.31203	-16.0447	6.22e-58	6.76e-56
cg07562918	0.0884481	0.00035653	0.00120697	ENSG00000240498.5	CDKN2B-AS1, RP11-149I2.4	antisense	chr9	21994778	22121097	-5.00644	0.31203	-16.0447	6.22e-58	6.76e-56
cg06800962	-0.0495042	0.00179853	0.00524195	ENSG00000240541.2	TM4SF1-AS1	antisense	chr3	149377778	149386583	1.8194	0.228143	7.97481	1.53e-15	1.05e-14
cg23246821	-0.0241158	9.37e-07	4.83e-06	ENSG00000240541.2	TM4SF1-AS1	antisense	chr3	149377778	149386583	1.8194	0.228143	7.97481	1.53e-15	1.05e-14
cg16810293	-0.0230384	0.00144764	0.00431331	ENSG00000240541.2	TM4SF1-AS1	antisense	chr3	149377778	149386583	1.8194	0.228143	7.97481	1.53e-15	1.05e-14
cg25859972	0.244938	6.72e-11	5.77e-10	ENSG00000241684.4	ADAMTS9-AS2	antisense	chr3	64684909	65011468	-2.26897	0.306669	-7.39877	1.37e-13	7.93e-13
cg22081832	0.204564	5.84e-14	6.93e-13	ENSG00000241684.4	ADAMTS9-AS2	antisense	chr3	64684909	65011468	-2.26897	0.306669	-7.39877	1.37e-13	7.93e-13
cg07891473	0.204477	1.03e-10	8.7e-10	ENSG00000241684.4	ADAMTS9-AS2	antisense	chr3	64684909	65011468	-2.26897	0.306669	-7.39877	1.37e-13	7.93e-13
cg04421973	0.19209	3.53e-09	2.49e-08	ENSG00000241684.4	ADAMTS9-AS2	antisense	chr3	64684909	65011468	-2.26897	0.306669	-7.39877	1.37e-13	7.93e-13
cg21938436	0.178949	6.96e-09	4.73e-08	ENSG00000241684.4	ADAMTS9-AS2	antisense	chr3	64684909	65011468	-2.26897	0.306669	-7.39877	1.37e-13	7.93e-13
cg26061177	0.159521	2.05e-07	1.16e-06	ENSG00000241684.4	ADAMTS9-AS2	antisense	chr3	64684909	65011468	-2.26897	0.306669	-7.39877	1.37e-13	7.93e-13
cg03427905	0.0842665	0.00561335	0.0144822	ENSG00000241684.4	ADAMTS9-AS2	antisense	chr3	64684909	65011468	-2.26897	0.306669	-7.39877	1.37e-13	7.93e-13
cg15956237	0.0781958	0.00306574	0.00845785	ENSG00000241684.4	ADAMTS9-AS2	antisense	chr3	64684909	65011468	-2.26897	0.306669	-7.39877	1.37e-13	7.93e-13
cg02090656	0.269416	4.95e-21	1.15e-19	ENSG00000243069.6	ARHGEF26-AS1	processed_transcript	chr3	154024401	154121332	-1.96268	0.34267	-5.7276	1.02e-08	3.59e-08
cg05476568	0.24473	4.57e-22	1.18e-20	ENSG00000243069.6	ARHGEF26-AS1	processed_transcript	chr3	154024401	154121332	-1.96268	0.34267	-5.7276	1.02e-08	3.59e-08
cg19853927	0.034069	0.00578231	0.0148634	ENSG00000243069.6	ARHGEF26-AS1	processed_transcript	chr3	154024401	154121332	-1.96268	0.34267	-5.7276	1.02e-08	3.59e-08
cg23472708	-0.043939	4.64e-15	6.16e-14	ENSG00000243479.3	MNX1-AS1	lincRNA	chr7	157010805	157016426	1.90294	0.14943	12.7347	3.79e-37	1.15e-35
cg14878520	-0.0415993	9.41e-13	9.89e-12	ENSG00000243479.3	MNX1-AS1	lincRNA	chr7	157010805	157016426	1.90294	0.14943	12.7347	3.79e-37	1.15e-35
cg07691705	-0.0380855	1.96e-14	2.44e-13	ENSG00000243479.3	MNX1-AS1	lincRNA	chr7	157010805	157016426	1.90294	0.14943	12.7347	3.79e-37	1.15e-35
cg04945652	-0.0355841	1.79e-06	8.85e-06	ENSG00000243479.3	MNX1-AS1	lincRNA	chr7	157010805	157016426	1.90294	0.14943	12.7347	3.79e-37	1.15e-35
cg02229433	-0.0307282	1.09e-14	1.39e-13	ENSG00000243479.3	MNX1-AS1	lincRNA	chr7	157010805	157016426	1.90294	0.14943	12.7347	3.79e-37	1.15e-35
cg02090014	-0.0152627	0.000353968	0.00119899	ENSG00000243479.3	MNX1-AS1	lincRNA	chr7	157010805	157016426	1.90294	0.14943	12.7347	3.79e-37	1.15e-35
cg00841693	-0.0129114	0.00716039	0.0179486	ENSG00000243479.3	MNX1-AS1	lincRNA	chr7	157010805	157016426	1.90294	0.14943	12.7347	3.79e-37	1.15e-35
cg20899053	-0.0067731	0.0115683	0.0272853	ENSG00000243479.3	MNX1-AS1	lincRNA	chr7	157010805	157016426	1.90294	0.14943	12.7347	3.79e-37	1.15e-35
cg21024826	-0.00578491	0.000139104	0.000508794	ENSG00000243479.3	MNX1-AS1	lincRNA	chr7	157010805	157016426	1.90294	0.14943	12.7347	3.79e-37	1.15e-35
cg16782084	0.0742558	2.42e-05	0.000101127	ENSG00000243832.1	RP11-202A13.1	lincRNA	chr3	134055256	134057648	-3.80656	0.294956	-12.9055	4.19e-38	1.36e-36
cg18443486	-0.0708321	0.000310399	0.00106331	ENSG00000244151.1	RP11-148K1.12	antisense	chr7	151074742	151076530	1.54161	0.158376	9.73385	2.16e-22	2.46e-21
cg15387987	-0.0450938	0.00569875	0.0146757	ENSG00000244151.1	RP11-148K1.12	antisense	chr7	151074742	151076530	1.54161	0.158376	9.73385	2.16e-22	2.46e-21
cg06339275	-0.0511223	0.0176135	0.0392669	ENSG00000244342.4	LINC00698	lincRNA	chr3	62950430	63125062	4.17372	0.448187	9.31245	1.25e-20	1.26e-19
cg18226868	-0.0183686	0.00324548	0.00890077	ENSG00000244879.4	GABPB1-AS1	antisense	chr15	50354959	50372202	1.10728	0.185646	5.96448	2.45e-09	9.24e-09
cg12587766	0.559416	1.68e-38	2.12e-36	ENSG00000244968.5	LIFR-AS1	antisense	chr5	38556786	38671216	-2.20389	0.231599	-9.51597	1.8e-21	1.93e-20
cg03723506	0.4184	7.02e-28	3.17e-26	ENSG00000244968.5	LIFR-AS1	antisense	chr5	38556786	38671216	-2.20389	0.231599	-9.51597	1.8e-21	1.93e-20
cg18848688	0.41264	6.53e-22	1.66e-20	ENSG00000244968.5	LIFR-AS1	antisense	chr5	38556786	38671216	-2.20389	0.231599	-9.51597	1.8e-21	1.93e-20
cg12602374	0.365996	1.79e-24	5.81e-23	ENSG00000244968.5	LIFR-AS1	antisense	chr5	38556786	38671216	-2.20389	0.231599	-9.51597	1.8e-21	1.93e-20
cg08392199	0.360308	7.89e-39	1.03e-36	ENSG00000244968.5	LIFR-AS1	antisense	chr5	38556786	38671216	-2.20389	0.231599	-9.51597	1.8e-21	1.93e-20
cg18174928	0.354562	2.66e-26	1.04e-24	ENSG00000244968.5	LIFR-AS1	antisense	chr5	38556786	38671216	-2.20389	0.231599	-9.51597	1.8e-21	1.93e-20
cg11841722	0.334272	1.02e-21	2.55e-20	ENSG00000244968.5	LIFR-AS1	antisense	chr5	38556786	38671216	-2.20389	0.231599	-9.51597	1.8e-21	1.93e-20
cg05923785	0.264325	6.24e-14	7.4e-13	ENSG00000244968.5	LIFR-AS1	antisense	chr5	38556786	38671216	-2.20389	0.231599	-9.51597	1.8e-21	1.93e-20
cg01369082	0.171414	3.77e-14	4.57e-13	ENSG00000244968.5	LIFR-AS1	antisense	chr5	38556786	38671216	-2.20389	0.231599	-9.51597	1.8e-21	1.93e-20
cg20699036	0.143198	2.83e-11	2.54e-10	ENSG00000244968.5	LIFR-AS1	antisense	chr5	38556786	38671216	-2.20389	0.231599	-9.51597	1.8e-21	1.93e-20
cg24913349	0.118003	9.39e-07	4.84e-06	ENSG00000244968.5	LIFR-AS1	antisense	chr5	38556786	38671216	-2.20389	0.231599	-9.51597	1.8e-21	1.93e-20
cg01241576	-0.045579	0.00729977	0.0182599	ENSG00000245067.5	IGFBP7-AS1	antisense	chr4	57109762	57205510	2.73963	0.394309	6.94794	3.71e-12	1.85e-11
cg03719314	-0.00865371	0.0128891	0.029979	ENSG00000245149.3	RNF139-AS1	lincRNA	chr8	124462485	124474576	1.36171	0.158816	8.57411	9.99e-18	8.12e-17
cg00251610	0.348576	1.11e-24	3.66e-23	ENSG00000245812.2	RP11-175K6.1	lincRNA	chr5	159100483	159117478	-1.13977	0.181383	-6.28375	3.3e-10	1.37e-09
cg01135780	0.298495	3.84e-22	9.98e-21	ENSG00000245812.2	RP11-175K6.1	lincRNA	chr5	159100483	159117478	-1.13977	0.181383	-6.28375	3.3e-10	1.37e-09
cg05056120	0.253573	3.43e-18	6.18e-17	ENSG00000245812.2	RP11-175K6.1	lincRNA	chr5	159100483	159117478	-1.13977	0.181383	-6.28375	3.3e-10	1.37e-09
cg05774756	0.241296	2.42e-12	2.43e-11	ENSG00000245812.2	RP11-175K6.1	lincRNA	chr5	159100483	159117478	-1.13977	0.181383	-6.28375	3.3e-10	1.37e-09
cg16126280	0.208036	1.47e-05	6.36e-05	ENSG00000245812.2	RP11-175K6.1	lincRNA	chr5	159100483	159117478	-1.13977	0.181383	-6.28375	3.3e-10	1.37e-09
cg04217450	0.193995	4.33e-05	0.000173383	ENSG00000245812.2	RP11-175K6.1	lincRNA	chr5	159100483	159117478	-1.13977	0.181383	-6.28375	3.3e-10	1.37e-09
cg26664797	0.171895	8.94e-05	0.000338632	ENSG00000245812.2	RP11-175K6.1	lincRNA	chr5	159100483	159117478	-1.13977	0.181383	-6.28375	3.3e-10	1.37e-09
cg05530568	0.15828	0.000836514	0.00262568	ENSG00000245812.2	RP11-175K6.1	lincRNA	chr5	159100483	159117478	-1.13977	0.181383	-6.28375	3.3e-10	1.37e-09
cg16317459	0.151045	0.000134641	0.000493702	ENSG00000245812.2	RP11-175K6.1	lincRNA	chr5	159100483	159117478	-1.13977	0.181383	-6.28375	3.3e-10	1.37e-09
cg17009297	0.147965	0.0010901	0.00333757	ENSG00000245812.2	RP11-175K6.1	lincRNA	chr5	159100483	159117478	-1.13977	0.181383	-6.28375	3.3e-10	1.37e-09
cg07607126	0.140283	0.000125353	0.000462408	ENSG00000245812.2	RP11-175K6.1	lincRNA	chr5	159100483	159117478	-1.13977	0.181383	-6.28375	3.3e-10	1.37e-09
cg17036833	0.0920321	0.00319462	0.00877532	ENSG00000245812.2	RP11-175K6.1	lincRNA	chr5	159100483	159117478	-1.13977	0.181383	-6.28375	3.3e-10	1.37e-09
cg07389710	-0.198453	6.58e-07	3.47e-06	ENSG00000246228.5	CASC8	antisense	chr8	127289817	127482139	2.5274	0.267283	9.4559	3.2e-21	3.37e-20
cg04557423	-0.070576	0.0189322	0.0417909	ENSG00000246228.5	CASC8	antisense	chr8	127289817	127482139	2.5274	0.267283	9.4559	3.2e-21	3.37e-20
cg05261028	-0.049839	0.019077	0.0420616	ENSG00000246228.5	CASC8	antisense	chr8	127289817	127482139	2.5274	0.267283	9.4559	3.2e-21	3.37e-20
cg14098951	-0.076963	4.17e-06	1.96e-05	ENSG00000246334.2	PRR7-AS1	antisense	chr5	177438503	177447699	2.54889	0.190294	13.3945	6.51e-41	2.51e-39
cg01580181	-0.0302032	0.0065542	0.0165949	ENSG00000246528.3	RP11-159H10.3	antisense	chr8	69834111	69854971	2.03489	0.239491	8.49673	1.95e-17	1.55e-16
cg03885062	-0.0200786	0.00233887	0.00663924	ENSG00000246898.1	LINC00920	lincRNA	chr16	66408524	66412135	1.89217	0.224447	8.43037	3.45e-17	2.69e-16
cg11853320	-0.0756303	3.08e-19	6.1e-18	ENSG00000247381.2	PDX1-AS1	antisense	chr13	27833444	27921404	5.40559	0.379478	14.2448	4.83e-46	2.62e-44
cg07860673	-0.0392817	1.65e-11	1.52e-10	ENSG00000247381.2	PDX1-AS1	antisense	chr13	27833444	27921404	5.40559	0.379478	14.2448	4.83e-46	2.62e-44
cg04408488	-0.0347351	1.61e-15	2.23e-14	ENSG00000247381.2	PDX1-AS1	antisense	chr13	27833444	27921404	5.40559	0.379478	14.2448	4.83e-46	2.62e-44
cg04633225	-0.0294245	1.02e-14	1.31e-13	ENSG00000247381.2	PDX1-AS1	antisense	chr13	27833444	27921404	5.40559	0.379478	14.2448	4.83e-46	2.62e-44
cg26731781	-0.0257542	1.36e-06	6.84e-06	ENSG00000247381.2	PDX1-AS1	antisense	chr13	27833444	27921404	5.40559	0.379478	14.2448	4.83e-46	2.62e-44
cg17740399	-0.0233892	5.81e-09	3.99e-08	ENSG00000247381.2	PDX1-AS1	antisense	chr13	27833444	27921404	5.40559	0.379478	14.2448	4.83e-46	2.62e-44
cg26344532	-0.0203701	2.01e-09	1.46e-08	ENSG00000247381.2	PDX1-AS1	antisense	chr13	27833444	27921404	5.40559	0.379478	14.2448	4.83e-46	2.62e-44
cg26793256	-0.0111745	0.00120936	0.00366644	ENSG00000247381.2	PDX1-AS1	antisense	chr13	27833444	27921404	5.40559	0.379478	14.2448	4.83e-46	2.62e-44
cg23198902	0.259613	8.65e-15	1.12e-13	ENSG00000248174.4	RP11-148L24.1	lincRNA	chr4	174094660	174220398	-3.65136	0.364105	-10.0283	1.14e-23	1.44e-22
cg24472939	0.222859	1.54e-08	1e-07	ENSG00000248174.4	RP11-148L24.1	lincRNA	chr4	174094660	174220398	-3.65136	0.364105	-10.0283	1.14e-23	1.44e-22
cg21873817	0.204144	2.13e-10	1.73e-09	ENSG00000248174.4	RP11-148L24.1	lincRNA	chr4	174094660	174220398	-3.65136	0.364105	-10.0283	1.14e-23	1.44e-22
cg12910087	0.104351	0.00494494	0.0129412	ENSG00000248174.4	RP11-148L24.1	lincRNA	chr4	174094660	174220398	-3.65136	0.364105	-10.0283	1.14e-23	1.44e-22
cg25611476	0.143879	0.000232139	0.000814383	ENSG00000248309.4	MEF2C-AS1	antisense	chr5	88883328	89466398	-2.53135	0.279329	-9.06226	1.28e-19	1.2e-18
cg15190401	0.113413	0.000385907	0.00129791	ENSG00000248309.4	MEF2C-AS1	antisense	chr5	88883328	89466398	-2.53135	0.279329	-9.06226	1.28e-19	1.2e-18
cg26650655	0.105582	0.000920715	0.00286505	ENSG00000248309.4	MEF2C-AS1	antisense	chr5	88883328	89466398	-2.53135	0.279329	-9.06226	1.28e-19	1.2e-18
cg02761345	0.102189	0.00138802	0.00415222	ENSG00000248309.4	MEF2C-AS1	antisense	chr5	88883328	89466398	-2.53135	0.279329	-9.06226	1.28e-19	1.2e-18
cg13995101	0.0960141	0.00192226	0.00556563	ENSG00000248309.4	MEF2C-AS1	antisense	chr5	88883328	89466398	-2.53135	0.279329	-9.06226	1.28e-19	1.2e-18
cg22426944	0.0769621	0.00608676	0.0155509	ENSG00000248309.4	MEF2C-AS1	antisense	chr5	88883328	89466398	-2.53135	0.279329	-9.06226	1.28e-19	1.2e-18
cg08223748	0.0741593	0.00848739	0.0208377	ENSG00000248309.4	MEF2C-AS1	antisense	chr5	88883328	89466398	-2.53135	0.279329	-9.06226	1.28e-19	1.2e-18
cg17783982	0.0685996	0.00767395	0.019082	ENSG00000248309.4	MEF2C-AS1	antisense	chr5	88883328	89466398	-2.53135	0.279329	-9.06226	1.28e-19	1.2e-18
cg07742134	0.0563619	0.0105927	0.0252721	ENSG00000248309.4	MEF2C-AS1	antisense	chr5	88883328	89466398	-2.53135	0.279329	-9.06226	1.28e-19	1.2e-18
cg16105594	0.0562578	0.0010797	0.00330918	ENSG00000248309.4	MEF2C-AS1	antisense	chr5	88883328	89466398	-2.53135	0.279329	-9.06226	1.28e-19	1.2e-18
cg02331902	-0.0617994	1.47e-49	5.16e-47	ENSG00000248323.4	LUCAT1, RP11-213H15.4	lincRNA	chr5	91303029	91314402	3.27595	0.324295	10.1017	5.43e-24	7.03e-23
cg04465154	-0.3515	4.99e-60	4.31e-57	ENSG00000248538.5	RP11-10A14.5	lincRNA	chr8	9189011	9202854	4.41234	0.419884	10.5085	7.9e-26	1.16e-24
cg07897871	-0.0947823	2.75e-06	1.33e-05	ENSG00000249007.1	RP11-465N4.4, RP11-510N19.5	sense_intronic	chr1	202011370	202015657	1.53311	0.18895	8.11383	4.9e-16	3.5e-15
cg02076020	-0.0830172	1.82e-06	9.01e-06	ENSG00000249007.1	RP11-465N4.4, RP11-510N19.5	sense_intronic	chr1	202011370	202015657	1.53311	0.18895	8.11383	4.9e-16	3.5e-15
cg26328757	-0.0559426	0.000156372	0.000566346	ENSG00000249007.1	RP11-465N4.4, RP11-510N19.5	sense_intronic	chr1	202011370	202015657	1.53311	0.18895	8.11383	4.9e-16	3.5e-15
cg16986578	-0.053754	0.000574217	0.00186497	ENSG00000249007.1	RP11-465N4.4, RP11-510N19.5	sense_intronic	chr1	202011370	202015657	1.53311	0.18895	8.11383	4.9e-16	3.5e-15
cg26808687	-0.0441172	0.0130798	0.0303612	ENSG00000249007.1	RP11-465N4.4, RP11-510N19.5	sense_intronic	chr1	202011370	202015657	1.53311	0.18895	8.11383	4.9e-16	3.5e-15
cg18966401	-0.0370283	0.0102804	0.0246242	ENSG00000249007.1	RP11-465N4.4, RP11-510N19.5	sense_intronic	chr1	202011370	202015657	1.53311	0.18895	8.11383	4.9e-16	3.5e-15
cg07154254	-0.0230103	0.0042973	0.0114226	ENSG00000249007.1	RP11-465N4.4, RP11-510N19.5	sense_intronic	chr1	202011370	202015657	1.53311	0.18895	8.11383	4.9e-16	3.5e-15
cg23174201	-0.0997883	4.75e-05	0.000188553	ENSG00000249035.5	CTB-113P19.1	antisense	chr5	151676945	151724782	3.84302	0.441608	8.70234	3.25e-18	2.74e-17
cg12820134	-0.278936	6.23e-18	1.09e-16	ENSG00000249196.5	RP11-669N7.2	antisense	chr12	129109629	129113294	6.47268	0.927949	6.97525	3.05e-12	1.54e-11
cg09169320	-0.118686	0.00822679	0.0202794	ENSG00000249267.5	LINC00939, RP5-916L7.2	lincRNA	chr12	125958688	125983374	2.13557	0.45844	4.65833	3.19e-06	8.3e-06
cg03729251	0.139708	4.34e-17	7.04e-16	ENSG00000249690.1	RP11-1336O20.2	antisense	chr4	150579089	150581545	-1.35775	0.643257	-2.11075	0.034794	0.0478183
cg07904475	0.129952	8.94e-16	1.28e-14	ENSG00000249690.1	RP11-1336O20.2	antisense	chr4	150579089	150581545	-1.35775	0.643257	-2.11075	0.034794	0.0478183
cg25995955	0.032998	0.0087023	0.0213004	ENSG00000249690.1	RP11-1336O20.2	antisense	chr4	150579089	150581545	-1.35775	0.643257	-2.11075	0.034794	0.0478183
cg20668096	0.0191249	0.00379772	0.0102351	ENSG00000249690.1	RP11-1336O20.2	antisense	chr4	150579089	150581545	-1.35775	0.643257	-2.11075	0.034794	0.0478183
cg03317642	-0.0673848	0.00119265	0.00362071	ENSG00000249743.4	RP11-60A8.1	lincRNA	chr5	73213947	73294934	3.5572	0.432667	8.22156	2.01e-16	1.48e-15
cg24514600	-0.148328	5.6e-11	4.85e-10	ENSG00000249859.6	PVT1	lincRNA	chr8	127794533	128101253	2.81761	0.132776	21.2207	6.14e-100	3.64e-97
cg21672705	0.00299584	0.0211912	0.046036	ENSG00000249898.6	CTD-2541M15.1	antisense	chr8	6618475	6708209	-1.3605	0.154972	-8.779	1.65e-18	1.42e-17
cg16675029	0.00117118	0.0207391	0.0451833	ENSG00000249898.6	CTD-2541M15.1	antisense	chr8	6618475	6708209	-1.3605	0.154972	-8.779	1.65e-18	1.42e-17
cg03416085	0.127214	1.76e-05	7.51e-05	ENSG00000250056.4	LINC01018	lincRNA	chr5	6582136	6588499	-1.79097	0.401744	-4.45799	8.27e-06	2.03e-05
cg24765924	0.092002	0.00143501	0.00427932	ENSG00000250056.4	LINC01018	lincRNA	chr5	6582136	6588499	-1.79097	0.401744	-4.45799	8.27e-06	2.03e-05
cg14818279	-0.108778	0.00016963	0.000610231	ENSG00000250072.4	CTC-529P8.1	lincRNA	chr5	149063317	149109787	3.17228	0.349849	9.06758	1.22e-19	1.15e-18
cg01965939	-0.0356147	8.15e-05	0.000311065	ENSG00000250072.4	CTC-529P8.1	lincRNA	chr5	149063317	149109787	3.17228	0.349849	9.06758	1.22e-19	1.15e-18
cg22621734	-0.031237	0.00968847	0.0233761	ENSG00000250072.4	CTC-529P8.1	lincRNA	chr5	149063317	149109787	3.17228	0.349849	9.06758	1.22e-19	1.15e-18
cg16857192	0.0455974	0.00652814	0.0165368	ENSG00000250073.2	RP11-677M14.3	antisense	chr11	124759129	124765936	-1.98932	0.159495	-12.4726	1.05e-35	2.9e-34
cg07541701	-0.0403338	0.00694093	0.0174549	ENSG00000250133.2	HOXC-AS2	processed_transcript	chr12	53993810	53996785	2.55493	0.482224	5.29823	1.17e-07	3.64e-07
cg26049390	-0.140896	1.14e-09	8.5e-09	ENSG00000250295.5	RP11-434I12.2, RP11-434I12.3	antisense	chr8	73297711	73356461	1.60899	0.286645	5.61319	1.99e-08	6.77e-08
cg07690181	0.466692	9.08e-25	3.03e-23	ENSG00000250320.4	CTD-2269F5.1	antisense	chr5	84384427	84490765	-2.33814	0.215666	-10.8415	2.19e-27	3.55e-26
cg07201620	0.422521	4.55e-26	1.73e-24	ENSG00000250320.4	CTD-2269F5.1	antisense	chr5	84384427	84490765	-2.33814	0.215666	-10.8415	2.19e-27	3.55e-26
cg04512917	0.391437	4.34e-29	2.2e-27	ENSG00000250320.4	CTD-2269F5.1	antisense	chr5	84384427	84490765	-2.33814	0.215666	-10.8415	2.19e-27	3.55e-26
cg11559250	0.384695	2.49e-20	5.44e-19	ENSG00000250320.4	CTD-2269F5.1	antisense	chr5	84384427	84490765	-2.33814	0.215666	-10.8415	2.19e-27	3.55e-26
cg01072952	0.354371	1.93e-39	2.67e-37	ENSG00000250320.4	CTD-2269F5.1	antisense	chr5	84384427	84490765	-2.33814	0.215666	-10.8415	2.19e-27	3.55e-26
cg16099804	0.336614	2.84e-15	3.85e-14	ENSG00000250320.4	CTD-2269F5.1	antisense	chr5	84384427	84490765	-2.33814	0.215666	-10.8415	2.19e-27	3.55e-26
cg16773899	0.296395	9.7e-16	1.38e-14	ENSG00000250320.4	CTD-2269F5.1	antisense	chr5	84384427	84490765	-2.33814	0.215666	-10.8415	2.19e-27	3.55e-26
cg01604322	0.290961	1.84e-15	2.55e-14	ENSG00000250320.4	CTD-2269F5.1	antisense	chr5	84384427	84490765	-2.33814	0.215666	-10.8415	2.19e-27	3.55e-26
cg24988625	0.28886	3.03e-16	4.52e-15	ENSG00000250320.4	CTD-2269F5.1	antisense	chr5	84384427	84490765	-2.33814	0.215666	-10.8415	2.19e-27	3.55e-26
cg03478689	0.268709	1.42e-10	1.18e-09	ENSG00000250320.4	CTD-2269F5.1	antisense	chr5	84384427	84490765	-2.33814	0.215666	-10.8415	2.19e-27	3.55e-26
cg15716405	0.261257	6.68e-11	5.74e-10	ENSG00000250320.4	CTD-2269F5.1	antisense	chr5	84384427	84490765	-2.33814	0.215666	-10.8415	2.19e-27	3.55e-26
cg12460433	0.246753	3.48e-08	2.17e-07	ENSG00000250320.4	CTD-2269F5.1	antisense	chr5	84384427	84490765	-2.33814	0.215666	-10.8415	2.19e-27	3.55e-26
cg24002167	0.242705	6.68e-09	4.55e-08	ENSG00000250320.4	CTD-2269F5.1	antisense	chr5	84384427	84490765	-2.33814	0.215666	-10.8415	2.19e-27	3.55e-26
cg17559809	0.217474	4.15e-08	2.56e-07	ENSG00000250320.4	CTD-2269F5.1	antisense	chr5	84384427	84490765	-2.33814	0.215666	-10.8415	2.19e-27	3.55e-26
cg24553364	0.199915	1.05e-07	6.18e-07	ENSG00000250320.4	CTD-2269F5.1	antisense	chr5	84384427	84490765	-2.33814	0.215666	-10.8415	2.19e-27	3.55e-26
cg05179846	0.188311	2.98e-07	1.64e-06	ENSG00000250320.4	CTD-2269F5.1	antisense	chr5	84384427	84490765	-2.33814	0.215666	-10.8415	2.19e-27	3.55e-26
cg22920665	0.170322	5.09e-09	3.52e-08	ENSG00000250320.4	CTD-2269F5.1	antisense	chr5	84384427	84490765	-2.33814	0.215666	-10.8415	2.19e-27	3.55e-26
cg02748539	0.149456	8.27e-08	4.92e-07	ENSG00000250385.1	RP11-310P5.2	antisense	chr5	524705	526594	-1.83051	0.416654	-4.39337	1.12e-05	2.69e-05
cg26541920	0.123471	2.58e-07	1.44e-06	ENSG00000250385.1	RP11-310P5.2	antisense	chr5	524705	526594	-1.83051	0.416654	-4.39337	1.12e-05	2.69e-05
cg12628145	0.118128	0.00071801	0.00228589	ENSG00000250385.1	RP11-310P5.2	antisense	chr5	524705	526594	-1.83051	0.416654	-4.39337	1.12e-05	2.69e-05
cg09822697	0.105626	0.00116151	0.00353485	ENSG00000250385.1	RP11-310P5.2	antisense	chr5	524705	526594	-1.83051	0.416654	-4.39337	1.12e-05	2.69e-05
cg02354563	0.0825255	2.72e-05	0.000112405	ENSG00000250385.1	RP11-310P5.2	antisense	chr5	524705	526594	-1.83051	0.416654	-4.39337	1.12e-05	2.69e-05
cg15124303	0.081625	0.00501017	0.0130941	ENSG00000250385.1	RP11-310P5.2	antisense	chr5	524705	526594	-1.83051	0.416654	-4.39337	1.12e-05	2.69e-05
cg01377305	0.0516813	0.0207654	0.0452307	ENSG00000250385.1	RP11-310P5.2	antisense	chr5	524705	526594	-1.83051	0.416654	-4.39337	1.12e-05	2.69e-05
cg18930994	0.432651	2.92e-32	2.01e-30	ENSG00000250538.4	RP11-92A5.2	antisense	chr4	155206529	155209027	-4.18371	0.510818	-8.19022	2.61e-16	1.91e-15
cg20271517	0.405508	1.91e-30	1.1e-28	ENSG00000250538.4	RP11-92A5.2	antisense	chr4	155206529	155209027	-4.18371	0.510818	-8.19022	2.61e-16	1.91e-15
cg07121547	0.371597	1.08e-22	2.96e-21	ENSG00000250538.4	RP11-92A5.2	antisense	chr4	155206529	155209027	-4.18371	0.510818	-8.19022	2.61e-16	1.91e-15
cg06812991	0.337771	2.21e-37	2.5e-35	ENSG00000250538.4	RP11-92A5.2	antisense	chr4	155206529	155209027	-4.18371	0.510818	-8.19022	2.61e-16	1.91e-15
cg14586939	0.335024	1.4e-22	3.78e-21	ENSG00000250538.4	RP11-92A5.2	antisense	chr4	155206529	155209027	-4.18371	0.510818	-8.19022	2.61e-16	1.91e-15
cg26384430	0.32097	6.82e-21	1.57e-19	ENSG00000250538.4	RP11-92A5.2	antisense	chr4	155206529	155209027	-4.18371	0.510818	-8.19022	2.61e-16	1.91e-15
cg14811608	0.303697	1.2e-16	1.86e-15	ENSG00000250538.4	RP11-92A5.2	antisense	chr4	155206529	155209027	-4.18371	0.510818	-8.19022	2.61e-16	1.91e-15
cg03202738	0.290691	2.32e-14	2.87e-13	ENSG00000250538.4	RP11-92A5.2	antisense	chr4	155206529	155209027	-4.18371	0.510818	-8.19022	2.61e-16	1.91e-15
cg21512644	0.286092	1.61e-35	1.53e-33	ENSG00000250538.4	RP11-92A5.2	antisense	chr4	155206529	155209027	-4.18371	0.510818	-8.19022	2.61e-16	1.91e-15
cg00954382	0.284588	1.78e-18	3.28e-17	ENSG00000250538.4	RP11-92A5.2	antisense	chr4	155206529	155209027	-4.18371	0.510818	-8.19022	2.61e-16	1.91e-15
cg07707546	0.259595	5.12e-14	6.12e-13	ENSG00000250538.4	RP11-92A5.2	antisense	chr4	155206529	155209027	-4.18371	0.510818	-8.19022	2.61e-16	1.91e-15
cg27504805	0.251788	5.28e-11	4.59e-10	ENSG00000250538.4	RP11-92A5.2	antisense	chr4	155206529	155209027	-4.18371	0.510818	-8.19022	2.61e-16	1.91e-15
cg24722950	-0.0481474	0.0119826	0.0281451	ENSG00000250548.5	RP11-47I22.2	lincRNA	chr14	61556313	61570653	2.83768	0.359818	7.88642	3.11e-15	2.08e-14
cg21161136	0.354363	6.24e-26	2.34e-24	ENSG00000250742.1	RP11-834C11.5, RP11-834C11.4	lincRNA	chr12	54126098	54132843	-1.54186	0.173997	-8.86139	7.9e-19	6.98e-18
cg08740524	0.284117	2.87e-22	7.54e-21	ENSG00000250742.1	RP11-834C11.5, RP11-834C11.4	lincRNA	chr12	54126098	54132843	-1.54186	0.173997	-8.86139	7.9e-19	6.98e-18
cg00659495	0.184818	1.31e-13	1.5e-12	ENSG00000250742.1	RP11-834C11.5, RP11-834C11.4	lincRNA	chr12	54126098	54132843	-1.54186	0.173997	-8.86139	7.9e-19	6.98e-18
cg07059157	0.1148	5.8e-12	5.6e-11	ENSG00000250742.1	RP11-834C11.5, RP11-834C11.4	lincRNA	chr12	54126098	54132843	-1.54186	0.173997	-8.86139	7.9e-19	6.98e-18
cg26812397	-0.0118073	0.00283533	0.0078869	ENSG00000250917.1	RP4-785G19.5	sense_overlapping	chr20	34234840	34281173	2.24063	0.237263	9.44364	3.6e-21	3.78e-20
cg21204600	-0.0759877	0.00847398	0.0208094	ENSG00000251164.1	HULC	lincRNA	chr6	8652137	8653846	7.14008	0.637983	11.1916	4.48e-29	8.07e-28
cg27143204	-0.0409423	0.00870763	0.021312	ENSG00000251307.1	RP11-506H20.1	antisense	chr5	55233934	55295201	2.18863	0.191066	11.4548	2.22e-30	4.36e-29
cg10584209	-0.0341954	0.000419815	0.00140207	ENSG00000251307.1	RP11-506H20.1	antisense	chr5	55233934	55295201	2.18863	0.191066	11.4548	2.22e-30	4.36e-29
cg05534186	-0.0283154	1e-05	4.44e-05	ENSG00000251307.1	RP11-506H20.1	antisense	chr5	55233934	55295201	2.18863	0.191066	11.4548	2.22e-30	4.36e-29
cg05425754	-0.0166171	2.51e-05	0.00010437	ENSG00000251307.1	RP11-506H20.1	antisense	chr5	55233934	55295201	2.18863	0.191066	11.4548	2.22e-30	4.36e-29
cg27075800	-0.0844582	6.75e-06	3.08e-05	ENSG00000251381.5	LINC00958	lincRNA	chr11	12962510	12989548	2.36482	0.366768	6.44773	1.14e-10	4.93e-10
cg05318516	-0.154673	4.59e-11	4.02e-10	ENSG00000253161.4	RP11-150O12.1	lincRNA	chr8	37421341	37554183	3.16718	0.200317	15.8108	2.62e-56	2.51e-54
cg25450061	0.0685376	0.000681089	0.00217843	ENSG00000253549.4	RP11-317J10.2	antisense	chr8	85441851	85464915	-2.98076	0.229982	-12.9609	2.04e-38	6.78e-37
cg07353006	-0.181772	7.75e-13	8.21e-12	ENSG00000253649.2	PRSS51	antisense	chr8	10482878	10547585	2.97748	0.351495	8.4709	2.44e-17	1.93e-16
cg02525722	-0.106029	0.000102473	0.000384073	ENSG00000253649.2	PRSS51	antisense	chr8	10482878	10547585	2.97748	0.351495	8.4709	2.44e-17	1.93e-16
cg11489090	-0.0599551	0.000163977	0.000591636	ENSG00000253649.2	PRSS51	antisense	chr8	10482878	10547585	2.97748	0.351495	8.4709	2.44e-17	1.93e-16
cg07692172	-0.0916802	7.65e-05	0.000293352	ENSG00000253716.4	RP13-582O9.5	antisense	chr8	143280161	143281690	1.32705	0.137434	9.65594	4.64e-22	5.18e-21
cg10941189	-0.0532537	0.000276494	0.000956089	ENSG00000253716.4	RP13-582O9.5	antisense	chr8	143280161	143281690	1.32705	0.137434	9.65594	4.64e-22	5.18e-21
cg19005830	-0.0776438	3.76e-10	2.97e-09	ENSG00000254142.2	RP11-53M11.3	lincRNA	chr8	54554361	54561927	5.65396	0.464355	12.1759	4.18e-34	1.04e-32
cg03374695	-0.0520335	0.00611981	0.0156252	ENSG00000254286.4	RP11-103H7.5, RP11-89K10.1	antisense	chr8	126557875	126713415	1.28887	0.185487	6.94856	3.69e-12	1.85e-11
cg13528935	-0.041724	7.47e-08	4.46e-07	ENSG00000254286.4	RP11-103H7.5, RP11-89K10.1	antisense	chr8	126557875	126713415	1.28887	0.185487	6.94856	3.69e-12	1.85e-11
cg05048159	-0.0220648	0.000724847	0.00230579	ENSG00000254286.4	RP11-103H7.5, RP11-89K10.1	antisense	chr8	126557875	126713415	1.28887	0.185487	6.94856	3.69e-12	1.85e-11
cg03959515	-0.0218119	0.00867169	0.0212336	ENSG00000254286.4	RP11-103H7.5, RP11-89K10.1	antisense	chr8	126557875	126713415	1.28887	0.185487	6.94856	3.69e-12	1.85e-11
cg02623050	-0.0212319	0.00776369	0.0192765	ENSG00000254286.4	RP11-103H7.5, RP11-89K10.1	antisense	chr8	126557875	126713415	1.28887	0.185487	6.94856	3.69e-12	1.85e-11
cg23179168	-0.0161937	2.29e-16	3.46e-15	ENSG00000254286.4	RP11-89K10.1	antisense	chr8	126557875	126713415	1.28887	0.185487	6.94856	3.69e-12	1.85e-11
cg14963406	-0.0725392	0.000250836	0.000874469	ENSG00000254389.3	RHPN1-AS1	antisense	chr8	143366631	143368548	1.91751	0.186508	10.2811	8.57e-25	1.17e-23
cg13159388	-0.0506567	2.59e-08	1.64e-07	ENSG00000254389.3	RHPN1-AS1	antisense	chr8	143366631	143368548	1.91751	0.186508	10.2811	8.57e-25	1.17e-23
cg04441815	-0.0383679	0.00230066	0.00654172	ENSG00000254389.3	RHPN1-AS1	antisense	chr8	143366631	143368548	1.91751	0.186508	10.2811	8.57e-25	1.17e-23
cg24057637	0.134842	2.24e-05	9.41e-05	ENSG00000254510.1	RP11-867G23.10	processed_transcript	chr11	66409158	66417137	-2.99087	0.256863	-11.6438	2.47e-31	5.13e-30
cg13319698	0.0858959	7.06e-05	0.000272434	ENSG00000254510.1	RP11-867G23.10	processed_transcript	chr11	66409158	66417137	-2.99087	0.256863	-11.6438	2.47e-31	5.13e-30
cg00910972	-0.0973898	2.49e-06	1.21e-05	ENSG00000254548.1	RP11-429J17.5	antisense	chr8	143718246	143718891	4.63447	0.412962	11.2225	3.16e-29	5.78e-28
cg20000220	-0.0787549	1.73e-05	7.38e-05	ENSG00000254548.1	RP11-429J17.5	antisense	chr8	143718246	143718891	4.63447	0.412962	11.2225	3.16e-29	5.78e-28
cg06344474	-0.0681271	2.71e-05	0.000112118	ENSG00000254548.1	RP11-429J17.5	antisense	chr8	143718246	143718891	4.63447	0.412962	11.2225	3.16e-29	5.78e-28
cg21039438	-0.0974185	0.000200839	0.000713002	ENSG00000254739.1	RP13-46H24.1	antisense	chr11	528907	529659	2.3991	0.370799	6.47008	9.8e-11	4.28e-10
cg13167353	-0.0801751	0.000118663	0.000439625	ENSG00000254739.1	RP13-46H24.1	antisense	chr11	528907	529659	2.3991	0.370799	6.47008	9.8e-11	4.28e-10
cg06041759	-0.0780874	0.00312875	0.00861355	ENSG00000254739.1	RP13-46H24.1	antisense	chr11	528907	529659	2.3991	0.370799	6.47008	9.8e-11	4.28e-10
cg15343812	-0.0581394	0.00135288	0.00405724	ENSG00000254739.1	RP13-46H24.1	antisense	chr11	528907	529659	2.3991	0.370799	6.47008	9.8e-11	4.28e-10
cg05366118	-0.00595992	0.00881299	0.0215353	ENSG00000254973.1	RP11-429J17.7	lincRNA	chr8	143758153	143771822	2.66955	0.203763	13.1012	3.24e-39	1.14e-37
cg20127859	-0.302918	3.68e-51	1.49e-48	ENSG00000255050.1	RP11-661A12.9	antisense	chr8	143573490	143577397	2.22226	0.256338	8.66928	4.35e-18	3.63e-17
cg01048372	-0.0880258	0.000181213	0.00064877	ENSG00000255050.1	RP11-661A12.9	antisense	chr8	143573490	143577397	2.22226	0.256338	8.66928	4.35e-18	3.63e-17
cg19878482	-0.076951	2.27e-06	1.11e-05	ENSG00000255050.1	RP11-661A12.9	antisense	chr8	143573490	143577397	2.22226	0.256338	8.66928	4.35e-18	3.63e-17
cg19352605	-0.065964	0.00029462	0.00101346	ENSG00000255182.2	CTD-2517M22.14	processed_transcript	chr8	144495458	144505444	1.03861	0.170675	6.08534	1.16e-09	4.55e-09
cg16582889	-0.0631246	0.000746874	0.00236923	ENSG00000255182.2	CTD-2517M22.14	processed_transcript	chr8	144495458	144505444	1.03861	0.170675	6.08534	1.16e-09	4.55e-09
cg17869161	-0.0509104	0.000699256	0.00223146	ENSG00000255182.2	CTD-2517M22.14	processed_transcript	chr8	144495458	144505444	1.03861	0.170675	6.08534	1.16e-09	4.55e-09
cg06110286	-0.0335223	0.0222638	0.0480278	ENSG00000255182.2	CTD-2517M22.14	processed_transcript	chr8	144495458	144505444	1.03861	0.170675	6.08534	1.16e-09	4.55e-09
cg27145347	-0.102303	1.12e-05	4.94e-05	ENSG00000255306.1	RP5-901A4.1	antisense	chr11	68024809	68030461	1.10739	0.166332	6.6577	2.78e-11	1.28e-10
cg03951603	0.322004	1.16e-22	3.16e-21	ENSG00000255571.5	LINC00925	lincRNA	chr15	89361579	89398487	-1.23101	0.257026	-4.78943	1.67e-06	4.51e-06
cg26662049	0.175675	6.37e-16	9.22e-15	ENSG00000255571.5	LINC00925	lincRNA	chr15	89361579	89398487	-1.23101	0.257026	-4.78943	1.67e-06	4.51e-06
cg19157034	0.157798	2.78e-05	0.000114856	ENSG00000255571.5	LINC00925	lincRNA	chr15	89361579	89398487	-1.23101	0.257026	-4.78943	1.67e-06	4.51e-06
cg17941015	0.122939	6.5e-12	6.24e-11	ENSG00000255571.5	LINC00925	lincRNA	chr15	89361579	89398487	-1.23101	0.257026	-4.78943	1.67e-06	4.51e-06
cg06022179	0.120196	5.31e-08	3.23e-07	ENSG00000255571.5	LINC00925	lincRNA	chr15	89361579	89398487	-1.23101	0.257026	-4.78943	1.67e-06	4.51e-06
cg03745604	0.0949534	0.00355046	0.00964116	ENSG00000255571.5	LINC00925	lincRNA	chr15	89361579	89398487	-1.23101	0.257026	-4.78943	1.67e-06	4.51e-06
cg15463907	0.0809761	0.00269973	0.00755122	ENSG00000255571.5	LINC00925	lincRNA	chr15	89361579	89398487	-1.23101	0.257026	-4.78943	1.67e-06	4.51e-06
cg12645886	0.0779011	0.00891638	0.0217526	ENSG00000255571.5	LINC00925	lincRNA	chr15	89361579	89398487	-1.23101	0.257026	-4.78943	1.67e-06	4.51e-06
cg11256214	-0.0722777	5.18e-12	5.03e-11	ENSG00000255650.4	FAM222A-AS1	antisense	chr12	109734166	109773508	3.57314	0.214878	16.6287	4.32e-62	5.54e-60
cg06892868	-0.0533905	0.000247706	0.000864424	ENSG00000255650.4	FAM222A-AS1	antisense	chr12	109734166	109773508	3.57314	0.214878	16.6287	4.32e-62	5.54e-60
cg00050496	-0.0524685	2.04e-05	8.6e-05	ENSG00000255650.4	FAM222A-AS1	antisense	chr12	109734166	109773508	3.57314	0.214878	16.6287	4.32e-62	5.54e-60
cg06840837	-0.0472288	9.45e-05	0.000356544	ENSG00000255650.4	FAM222A-AS1	antisense	chr12	109734166	109773508	3.57314	0.214878	16.6287	4.32e-62	5.54e-60
cg09251362	-0.0388834	0.00278587	0.0077648	ENSG00000255650.4	FAM222A-AS1	antisense	chr12	109734166	109773508	3.57314	0.214878	16.6287	4.32e-62	5.54e-60
cg16635128	-0.0351764	0.016734	0.0375684	ENSG00000255650.4	FAM222A-AS1	antisense	chr12	109734166	109773508	3.57314	0.214878	16.6287	4.32e-62	5.54e-60
cg16266358	-0.024461	0.00376443	0.0101561	ENSG00000255650.4	FAM222A-AS1	antisense	chr12	109734166	109773508	3.57314	0.214878	16.6287	4.32e-62	5.54e-60
cg21733363	-0.0179619	0.0206728	0.0450635	ENSG00000255717.5	SNHG1	processed_transcript	chr11	62851988	62855914	1.78651	0.112005	15.9503	2.84e-57	2.9e-55
cg05481085	0.0103387	0.0176583	0.039353	ENSG00000256139.2	RP11-968O1.5	sense_overlapping	chr12	109111218	109125594	-1.39367	0.184597	-7.54979	4.36e-14	2.63e-13
cg03124318	0.0786463	0.0171107	0.0382999	ENSG00000256262.1	USP30-AS1	antisense	chr12	109052350	109053952	-1.48687	0.196434	-7.5693	3.75e-14	2.28e-13
cg03070588	0.00762272	0.000720754	0.00229393	ENSG00000256262.1	USP30-AS1	antisense	chr12	109052350	109053952	-1.48687	0.196434	-7.5693	3.75e-14	2.28e-13
cg18552940	0.0014015	0.0112358	0.0266003	ENSG00000256262.1	USP30-AS1	antisense	chr12	109052350	109053952	-1.48687	0.196434	-7.5693	3.75e-14	2.28e-13
cg08925658	0.00170336	0.0154046	0.0349823	ENSG00000256377.4	RP11-1060J15.4	antisense	chr12	27696388	27710770	-1.85825	0.30701	-6.05273	1.42e-09	5.51e-09
cg02319782	-0.128908	3.27e-08	2.04e-07	ENSG00000256540.1	RP11-598F7.6	lincRNA	chr12	166856	182399	2.62036	0.230442	11.371	5.83e-30	1.11e-28
cg15447787	0.249504	2.85e-10	2.29e-09	ENSG00000256802.2	RP11-680F8.1	antisense	chr15	29674990	29680957	-1.30959	0.310549	-4.21702	2.48e-05	5.68e-05
cg24610231	0.179912	1.08e-08	7.2e-08	ENSG00000256802.2	RP11-680F8.1	antisense	chr15	29674990	29680957	-1.30959	0.310549	-4.21702	2.48e-05	5.68e-05
cg25840237	0.142878	4.45e-07	2.4e-06	ENSG00000256802.2	RP11-680F8.1	antisense	chr15	29674990	29680957	-1.30959	0.310549	-4.21702	2.48e-05	5.68e-05
cg13381245	0.0053383	0.0039976	0.0107131	ENSG00000256894.1	RP11-283G6.3	antisense	chr12	26125155	26126617	-1.01326	0.200748	-5.0474	4.48e-07	1.3e-06
cg19243777	0.00530184	0.0054042	0.0140032	ENSG00000256894.1	RP11-283G6.3	antisense	chr12	26125155	26126617	-1.01326	0.200748	-5.0474	4.48e-07	1.3e-06
cg15882878	-0.162319	2.44e-08	1.55e-07	ENSG00000256967.1	RP11-273B20.1	antisense	chr12	7129079	7131198	1.24904	0.172473	7.24192	4.42e-13	2.43e-12
cg06671621	-0.0528421	0.0134619	0.0311315	ENSG00000256967.1	RP11-273B20.1	antisense	chr12	7129079	7131198	1.24904	0.172473	7.24192	4.42e-13	2.43e-12
cg00489652	-0.051781	0.00827464	0.0203817	ENSG00000256967.1	RP11-273B20.1	antisense	chr12	7129079	7131198	1.24904	0.172473	7.24192	4.42e-13	2.43e-12
cg12430457	-0.272599	2.02e-09	1.46e-08	ENSG00000257191.1	RP11-390N6.1	antisense	chr12	78960258	79045644	3.9279	0.414356	9.47952	2.55e-21	2.71e-20
cg12690246	-0.0653776	4.74e-05	0.000188359	ENSG00000257588.1	RP11-469H8.6	antisense	chr12	49951512	49962924	6.05743	0.452613	13.3833	7.58e-41	2.91e-39
cg03624316	-0.202292	9.51e-24	2.88e-22	ENSG00000257605.2	RP11-680A11.5	antisense	chr12	53298655	53300314	1.37307	0.119465	11.4935	1.42e-30	2.82e-29
cg03404339	-0.119485	1.45e-06	7.27e-06	ENSG00000257671.1	RP3-416H24.1	antisense	chr12	52245048	52247448	3.9241	0.370127	10.6021	2.92e-26	4.42e-25
cg15889548	-0.0894215	1.8e-11	1.65e-10	ENSG00000257671.1	RP3-416H24.1	antisense	chr12	52245048	52247448	3.9241	0.370127	10.6021	2.92e-26	4.42e-25
cg25029197	-0.0679729	0.00230697	0.00655727	ENSG00000257671.1	RP3-416H24.1	antisense	chr12	52245048	52247448	3.9241	0.370127	10.6021	2.92e-26	4.42e-25
cg19832521	0.508584	3.94e-39	5.29e-37	ENSG00000257842.4	NOVA1-AS1	antisense	chr14	26598412	26806467	-1.43488	0.462833	-3.10021	0.00193381	0.00328209
cg07559273	0.456418	4.92e-22	1.26e-20	ENSG00000257842.4	NOVA1-AS1	antisense	chr14	26598412	26806467	-1.43488	0.462833	-3.10021	0.00193381	0.00328209
cg18488855	0.436901	3.64e-23	1.04e-21	ENSG00000257842.4	NOVA1-AS1	antisense	chr14	26598412	26806467	-1.43488	0.462833	-3.10021	0.00193381	0.00328209
cg16791424	0.417008	5.08e-21	1.19e-19	ENSG00000257842.4	NOVA1-AS1	antisense	chr14	26598412	26806467	-1.43488	0.462833	-3.10021	0.00193381	0.00328209
cg11146971	0.414783	1.23e-20	2.78e-19	ENSG00000257842.4	NOVA1-AS1	antisense	chr14	26598412	26806467	-1.43488	0.462833	-3.10021	0.00193381	0.00328209
cg15602241	0.358236	3.2e-16	4.78e-15	ENSG00000257842.4	NOVA1-AS1	antisense	chr14	26598412	26806467	-1.43488	0.462833	-3.10021	0.00193381	0.00328209
cg20478129	0.351538	1.86e-15	2.57e-14	ENSG00000257842.4	NOVA1-AS1	antisense	chr14	26598412	26806467	-1.43488	0.462833	-3.10021	0.00193381	0.00328209
cg02014003	0.228867	1.21e-13	1.4e-12	ENSG00000257842.4	NOVA1-AS1	antisense	chr14	26598412	26806467	-1.43488	0.462833	-3.10021	0.00193381	0.00328209
cg18468511	0.225713	5.31e-13	5.72e-12	ENSG00000257842.4	NOVA1-AS1	antisense	chr14	26598412	26806467	-1.43488	0.462833	-3.10021	0.00193381	0.00328209
cg20961943	0.136413	2.07e-10	1.69e-09	ENSG00000257842.4	NOVA1-AS1	antisense	chr14	26598412	26806467	-1.43488	0.462833	-3.10021	0.00193381	0.00328209
cg11136665	-0.216673	2.08e-15	2.86e-14	ENSG00000257925.1	RP11-493L12.3	antisense	chr12	47237734	47279021	3.00623	0.405553	7.41267	1.24e-13	7.18e-13
cg09938049	0.081519	1.98e-06	9.77e-06	ENSG00000258137.4	RP11-753H16.3, RP11-753H16.5	antisense	chr12	54353661	54497688	-3.57618	0.414102	-8.63597	5.82e-18	4.82e-17
cg20474425	0.0471899	0.00561301	0.0144816	ENSG00000258137.4	RP11-753H16.3, RP11-753H16.5	antisense	chr12	54353661	54497688	-3.57618	0.414102	-8.63597	5.82e-18	4.82e-17
cg23358740	-0.0521008	1.31e-07	7.6e-07	ENSG00000258404.1	RP11-1029J19.5	lincRNA	chr14	101634454	101731108	3.06981	0.238468	12.873	6.38e-38	2.05e-36
cg23418645	-0.0141516	0.00269988	0.00755154	ENSG00000258561.1	RP11-72M17.1	lincRNA	chr14	66212810	66509394	1.77089	0.178019	9.9478	2.58e-23	3.15e-22
cg09345825	-0.0132538	2.48e-05	0.000103453	ENSG00000258561.1	RP11-72M17.1	lincRNA	chr14	66212810	66509394	1.77089	0.178019	9.9478	2.58e-23	3.15e-22
cg26048690	-0.00543911	0.0211141	0.0458875	ENSG00000258561.1	RP11-72M17.1	lincRNA	chr14	66212810	66509394	1.77089	0.178019	9.9478	2.58e-23	3.15e-22
cg11787522	-0.187955	2.32e-11	2.1e-10	ENSG00000259264.4	RP11-60L3.1	antisense	chr15	74202705	74221557	5.25721	0.452348	11.6221	3.18e-31	6.58e-30
cg00075967	-0.187569	7.19e-09	4.88e-08	ENSG00000259264.4	RP11-60L3.1	antisense	chr15	74202705	74221557	5.25721	0.452348	11.6221	3.18e-31	6.58e-30
cg26774156	-0.169414	2.14e-07	1.2e-06	ENSG00000259264.4	RP11-60L3.1	antisense	chr15	74202705	74221557	5.25721	0.452348	11.6221	3.18e-31	6.58e-30
cg22672067	-0.156478	1.23e-14	1.56e-13	ENSG00000259264.4	RP11-60L3.1	antisense	chr15	74202705	74221557	5.25721	0.452348	11.6221	3.18e-31	6.58e-30
cg01332054	-0.151683	7.26e-06	3.29e-05	ENSG00000259264.4	RP11-60L3.1	antisense	chr15	74202705	74221557	5.25721	0.452348	11.6221	3.18e-31	6.58e-30
cg23887948	-0.145428	2.85e-05	0.000117706	ENSG00000259264.4	RP11-60L3.1	antisense	chr15	74202705	74221557	5.25721	0.452348	11.6221	3.18e-31	6.58e-30
cg13888509	-0.142082	2.71e-07	1.5e-06	ENSG00000259264.4	RP11-60L3.1	antisense	chr15	74202705	74221557	5.25721	0.452348	11.6221	3.18e-31	6.58e-30
cg17516330	-0.131335	1.48e-07	8.5e-07	ENSG00000259264.4	RP11-60L3.1	antisense	chr15	74202705	74221557	5.25721	0.452348	11.6221	3.18e-31	6.58e-30
cg18640660	-0.127872	3.07e-07	1.69e-06	ENSG00000259264.4	RP11-60L3.1	antisense	chr15	74202705	74221557	5.25721	0.452348	11.6221	3.18e-31	6.58e-30
cg00597876	-0.12734	1.05e-05	4.66e-05	ENSG00000259264.4	RP11-60L3.1	antisense	chr15	74202705	74221557	5.25721	0.452348	11.6221	3.18e-31	6.58e-30
cg03494277	-0.0310728	0.021375	0.0463754	ENSG00000259294.1	CTA-339C12.1	antisense	chr7	101822247	101824729	3.42299	0.500167	6.84369	7.72e-12	3.74e-11
cg14519777	-0.0302247	2.1e-06	1.03e-05	ENSG00000259294.1	CTA-339C12.1	antisense	chr7	101822247	101824729	3.42299	0.500167	6.84369	7.72e-12	3.74e-11
cg10101773	0.255569	1.69e-11	1.55e-10	ENSG00000259319.1	RP11-293M10.6	antisense	chr14	75423683	75427741	-1.78864	0.118063	-15.1499	7.59e-52	5.62e-50
cg02114084	0.169125	4.89e-09	3.39e-08	ENSG00000259319.1	RP11-293M10.6	antisense	chr14	75423683	75427741	-1.78864	0.118063	-15.1499	7.59e-52	5.62e-50
cg22783308	0.0443495	0.000355881	0.00120494	ENSG00000259319.1	RP11-293M10.6	antisense	chr14	75423683	75427741	-1.78864	0.118063	-15.1499	7.59e-52	5.62e-50
cg02921269	0.0311102	0.00151309	0.00448775	ENSG00000259319.1	RP11-293M10.6	antisense	chr14	75423683	75427741	-1.78864	0.118063	-15.1499	7.59e-52	5.62e-50
cg16299455	0.0233396	0.000676537	0.00216531	ENSG00000259319.1	RP11-293M10.6	antisense	chr14	75423683	75427741	-1.78864	0.118063	-15.1499	7.59e-52	5.62e-50
cg05157912	0.0148796	0.00510179	0.0133053	ENSG00000259319.1	RP11-293M10.6	antisense	chr14	75423683	75427741	-1.78864	0.118063	-15.1499	7.59e-52	5.62e-50
cg04438661	0.0234892	1.14e-05	5.01e-05	ENSG00000259370.2	RP11-1069G10.1	antisense	chr15	62827675	62884034	-1.95792	0.254101	-7.70528	1.31e-14	8.28e-14
cg00400827	-0.255076	3.68e-10	2.91e-09	ENSG00000259807.1	RP11-426C22.4	lincRNA	chr16	29217170	29220031	3.05292	0.312267	9.77663	1.42e-22	1.64e-21
cg04649852	-0.183534	2.5e-08	1.59e-07	ENSG00000259807.1	RP11-426C22.4	lincRNA	chr16	29217170	29220031	3.05292	0.312267	9.77663	1.42e-22	1.64e-21
cg09345153	-0.026598	0.0028746	0.00798351	ENSG00000259807.1	RP11-426C22.4	lincRNA	chr16	29217170	29220031	3.05292	0.312267	9.77663	1.42e-22	1.64e-21
cg19949931	-0.0616829	0.0144058	0.033007	ENSG00000259933.5	RP11-304L19.1	sense_overlapping	chr16	2091436	2095433	1.02977	0.136081	7.56735	3.81e-14	2.31e-13
cg19584660	-0.0515087	0.00859535	0.0210667	ENSG00000259933.5	RP11-304L19.1	sense_overlapping	chr16	2091436	2095433	1.02977	0.136081	7.56735	3.81e-14	2.31e-13
cg00850538	0.203412	1.24e-12	1.28e-11	ENSG00000260025.1	RP11-490M8.1	lincRNA	chr2	36354749	36355114	-1.27467	0.121155	-10.5209	6.92e-26	1.02e-24
cg15371815	0.189417	2.44e-09	1.76e-08	ENSG00000260025.1	RP11-490M8.1	lincRNA	chr2	36354749	36355114	-1.27467	0.121155	-10.5209	6.92e-26	1.02e-24
cg00535248	-0.0785982	0.000870529	0.00272203	ENSG00000260029.2	RP11-401P9.1	antisense	chr16	50551824	50553940	5.01071	0.642756	7.79566	6.41e-15	4.17e-14
cg18569988	-0.0907641	0.000412395	0.00137946	ENSG00000260261.1	RP11-480A16.1	lincRNA	chr3	195949188	195952695	1.33251	0.195986	6.79902	1.05e-11	5.05e-11
cg07895227	0.00579807	0.0217058	0.0469885	ENSG00000260273.1	RP11-425D10.10	antisense	chr6	109382795	109383666	-1.6853	0.140979	-11.9542	6.17e-33	1.42e-31
cg06854353	0.00438132	0.000753414	0.00238837	ENSG00000260273.1	RP11-425D10.10	antisense	chr6	109382795	109383666	-1.6853	0.140979	-11.9542	6.17e-33	1.42e-31
cg03627022	0.00326677	0.0121983	0.0285778	ENSG00000260273.1	RP11-425D10.10	antisense	chr6	109382795	109383666	-1.6853	0.140979	-11.9542	6.17e-33	1.42e-31
cg10082647	0.0739799	0.0149568	0.0340979	ENSG00000260329.1	RP11-412D9.4	antisense	chr12	106954029	106955497	-1.48103	0.15489	-9.56188	1.16e-21	1.25e-20
cg26297688	0.0660737	0.00193998	0.0056124	ENSG00000260329.1	RP11-412D9.4	antisense	chr12	106954029	106955497	-1.48103	0.15489	-9.56188	1.16e-21	1.25e-20
cg17208427	-0.0274473	1.19e-07	6.93e-07	ENSG00000260577.2	RP11-615I2.2	antisense	chr16	68644248	68646168	2.33224	0.183572	12.7047	5.57e-37	1.67e-35
cg17733331	-0.0138673	5.2e-06	2.41e-05	ENSG00000260577.2	RP11-615I2.2	antisense	chr16	68644248	68646168	2.33224	0.183572	12.7047	5.57e-37	1.67e-35
cg23581088	-0.438202	1.77e-63	1.98e-60	ENSG00000260604.2	RP1-140K8.5	lincRNA	chr6	3904920	3911979	4.4463	0.353275	12.5859	2.52e-36	7.3e-35
cg08246316	-0.0347859	0.00997189	0.0239755	ENSG00000260899.1	RP11-2C24.4	processed_transcript	chr16	30740667	30751381	1.23302	0.185352	6.65228	2.89e-11	1.33e-10
cg02324580	-0.0245934	0.0148773	0.0339436	ENSG00000260899.1	RP11-2C24.4	processed_transcript	chr16	30740667	30751381	1.23302	0.185352	6.65228	2.89e-11	1.33e-10
cg00023673	-0.122677	5.76e-05	0.000225649	ENSG00000261175.4	CTD-2015G9.1, CTD-2015G9.2	lincRNA	chr16	86722091	86741059	3.90867	0.503152	7.76836	7.95e-15	5.14e-14
cg26825573	-0.220446	3.47e-12	3.43e-11	ENSG00000261327.4	RP11-863P13.3	lincRNA	chr16	88177298	88178941	2.01985	0.259011	7.79832	6.27e-15	4.08e-14
cg03262260	-0.131694	2.29e-05	9.59e-05	ENSG00000261327.4	RP11-863P13.3	lincRNA	chr16	88177298	88178941	2.01985	0.259011	7.79832	6.27e-15	4.08e-14
cg03558269	-0.129182	1.36e-06	6.84e-06	ENSG00000261327.4	RP11-863P13.3	lincRNA	chr16	88177298	88178941	2.01985	0.259011	7.79832	6.27e-15	4.08e-14
cg23689429	-0.0667896	0.000791259	0.0024962	ENSG00000261327.4	RP11-863P13.3	lincRNA	chr16	88177298	88178941	2.01985	0.259011	7.79832	6.27e-15	4.08e-14
cg12827798	-0.14147	1.01e-07	5.93e-07	ENSG00000261553.4	RP11-29G8.3	processed_transcript	chr13	75549773	75807120	1.49689	0.201346	7.43445	1.05e-13	6.14e-13
cg14135807	-0.085618	4.33e-05	0.000173363	ENSG00000261553.4	RP11-29G8.3	processed_transcript	chr13	75549773	75807120	1.49689	0.201346	7.43445	1.05e-13	6.14e-13
cg09260667	-0.0639465	0.0133108	0.0308274	ENSG00000261685.2	RP11-401P9.4	lincRNA	chr16	50645809	50649249	1.75136	0.268428	6.52452	6.82e-11	3.02e-10
cg08236416	-0.139361	1.07e-09	8.05e-09	ENSG00000261804.1	RP11-44F14.2	lincRNA	chr16	53373493	53384745	1.25653	0.195919	6.4135	1.42e-10	6.13e-10
cg04506728	-0.0960114	0.00245535	0.00693637	ENSG00000261804.1	RP11-44F14.2	lincRNA	chr16	53373493	53384745	1.25653	0.195919	6.4135	1.42e-10	6.13e-10
cg02380802	-0.0802476	0.0182686	0.0405181	ENSG00000261804.1	RP11-44F14.2	lincRNA	chr16	53373493	53384745	1.25653	0.195919	6.4135	1.42e-10	6.13e-10
cg02382016	-0.0793547	0.00398957	0.010694	ENSG00000261804.1	RP11-44F14.2	lincRNA	chr16	53373493	53384745	1.25653	0.195919	6.4135	1.42e-10	6.13e-10
cg04653913	-0.0637067	0.0169115	0.0379102	ENSG00000261804.1	RP11-44F14.2	lincRNA	chr16	53373493	53384745	1.25653	0.195919	6.4135	1.42e-10	6.13e-10
cg06244240	0.189923	5.67e-17	9.08e-16	ENSG00000261888.1	AC144831.1	lincRNA	chr17	83104255	83106910	-2.03803	0.185613	-10.98	4.77e-28	7.99e-27
cg00668150	0.0915701	0.000178338	0.000639188	ENSG00000262050.1	RP11-74E22.3	antisense	chr17	2712309	2712833	-1.06991	0.146194	-7.31843	2.51e-13	1.41e-12
cg23001456	0.00460759	0.0148506	0.0338909	ENSG00000262050.1	RP11-74E22.3	antisense	chr17	2712309	2712833	-1.06991	0.146194	-7.31843	2.51e-13	1.41e-12
cg07155381	0.0437141	1.17e-05	5.15e-05	ENSG00000262061.4	RP11-1260E13.4	processed_transcript	chr17	331205	333488	-1.3242	0.266723	-4.96469	6.88e-07	1.95e-06
cg20021790	0.0422778	0.00356462	0.0096747	ENSG00000262061.4	RP11-1260E13.4	processed_transcript	chr17	331205	333488	-1.3242	0.266723	-4.96469	6.88e-07	1.95e-06
cg08937107	-0.217524	6.39e-15	8.34e-14	ENSG00000262370.4	RP11-473M20.9	lincRNA	chr16	3076911	3087100	2.3717	0.27032	8.77365	1.73e-18	1.49e-17
cg08730747	-0.137684	1.8e-06	8.92e-06	ENSG00000262712.1	RP11-295D4.1	sense_intronic	chr16	4335870	4337818	1.44423	0.148081	9.75298	1.79e-22	2.05e-21
cg09011038	-0.127212	2.84e-06	1.37e-05	ENSG00000262712.1	RP11-295D4.1	sense_intronic	chr16	4335870	4337818	1.44423	0.148081	9.75298	1.79e-22	2.05e-21
cg26490274	-0.120732	0.000797363	0.00251369	ENSG00000262712.1	RP11-295D4.1	sense_intronic	chr16	4335870	4337818	1.44423	0.148081	9.75298	1.79e-22	2.05e-21
cg04694492	-0.114052	0.000182548	0.00065323	ENSG00000262712.1	RP11-295D4.1	sense_intronic	chr16	4335870	4337818	1.44423	0.148081	9.75298	1.79e-22	2.05e-21
cg04252592	-0.0850639	0.000430836	0.00143533	ENSG00000262712.1	RP11-295D4.1	sense_intronic	chr16	4335870	4337818	1.44423	0.148081	9.75298	1.79e-22	2.05e-21
cg08602528	-0.0807938	0.0027785	0.00774633	ENSG00000262712.1	RP11-295D4.1	sense_intronic	chr16	4335870	4337818	1.44423	0.148081	9.75298	1.79e-22	2.05e-21
cg01498911	-0.0275611	0.0151521	0.0344817	ENSG00000262712.1	RP11-295D4.1	sense_intronic	chr16	4335870	4337818	1.44423	0.148081	9.75298	1.79e-22	2.05e-21
cg07516511	-0.0584543	4.38e-05	0.000174992	ENSG00000263325.1	LA16c-325D7.1	antisense	chr16	2857898	2859726	3.32331	0.296641	11.2031	3.94e-29	7.13e-28
cg07129104	-0.0422302	3.74e-05	0.000151218	ENSG00000263325.1	LA16c-325D7.1	antisense	chr16	2857898	2859726	3.32331	0.296641	11.2031	3.94e-29	7.13e-28
cg19328294	-0.0393435	3.14e-06	1.51e-05	ENSG00000263325.1	LA16c-325D7.1	antisense	chr16	2857898	2859726	3.32331	0.296641	11.2031	3.94e-29	7.13e-28
cg09745688	-0.0372747	0.00298423	0.00825619	ENSG00000263325.1	LA16c-325D7.1	antisense	chr16	2857898	2859726	3.32331	0.296641	11.2031	3.94e-29	7.13e-28
cg21452411	-0.0362058	0.000298813	0.00102675	ENSG00000263325.1	LA16c-325D7.1	antisense	chr16	2857898	2859726	3.32331	0.296641	11.2031	3.94e-29	7.13e-28
cg18345369	-0.031306	0.000188648	0.000673172	ENSG00000263325.1	LA16c-325D7.1	antisense	chr16	2857898	2859726	3.32331	0.296641	11.2031	3.94e-29	7.13e-28
cg05895034	-0.0299579	0.0105108	0.0251034	ENSG00000263325.1	LA16c-325D7.1	antisense	chr16	2857898	2859726	3.32331	0.296641	11.2031	3.94e-29	7.13e-28
cg00944388	-0.0278612	0.000309329	0.00105995	ENSG00000263325.1	LA16c-325D7.1	antisense	chr16	2857898	2859726	3.32331	0.296641	11.2031	3.94e-29	7.13e-28
cg00699901	-0.0212948	0.00186186	0.00540834	ENSG00000263325.1	LA16c-325D7.1	antisense	chr16	2857898	2859726	3.32331	0.296641	11.2031	3.94e-29	7.13e-28
cg27620871	-0.014926	0.00839866	0.0206488	ENSG00000263325.1	LA16c-325D7.1	antisense	chr16	2857898	2859726	3.32331	0.296641	11.2031	3.94e-29	7.13e-28
cg02496223	0.0744337	0.00255695	0.0071929	ENSG00000263429.3	LINC00675	lincRNA	chr17	10794913	10804099	-1.87219	0.157948	-11.8532	2.07e-32	4.62e-31
cg08681966	-0.0545446	1.24e-05	5.42e-05	ENSG00000263603.1	CTD-2349P21.6, CTD-2349P21.5	lincRNA	chr17	30729469	30731202	2.59272	0.371237	6.984	2.87e-12	1.45e-11
cg19283427	0.00459906	0.00223838	0.00638306	ENSG00000263823.1	RP11-326K13.4	antisense	chr18	31942575	31944156	-1.21665	0.0982186	-12.3871	3.07e-35	8.19e-34
cg24713499	0.00441069	0.00570972	0.0146998	ENSG00000263823.1	RP11-326K13.4	antisense	chr18	31942575	31944156	-1.21665	0.0982186	-12.3871	3.07e-35	8.19e-34
cg26302103	0.00239349	0.000201058	0.000713714	ENSG00000263823.1	RP11-326K13.4	antisense	chr18	31942575	31944156	-1.21665	0.0982186	-12.3871	3.07e-35	8.19e-34
cg14118546	0.00217377	0.00068578	0.00219216	ENSG00000263823.1	RP11-326K13.4	antisense	chr18	31942575	31944156	-1.21665	0.0982186	-12.3871	3.07e-35	8.19e-34
cg11938646	-0.0302732	0.0200175	0.0438446	ENSG00000264577.1	AC010761.8	antisense	chr17	28721487	28722877	1.27155	0.135358	9.39401	5.78e-21	5.96e-20
cg18319029	0.392084	2.79e-30	1.59e-28	ENSG00000265179.5	RP11-672L10.2	processed_transcript	chr18	902766	906667	-1.06686	0.345465	-3.08819	0.00201382	0.00341129
cg21438101	0.39031	7.56e-23	2.1e-21	ENSG00000265179.5	RP11-672L10.2	processed_transcript	chr18	902766	906667	-1.06686	0.345465	-3.08819	0.00201382	0.00341129
cg24287438	0.375853	1.47e-20	3.29e-19	ENSG00000265179.5	RP11-672L10.2	processed_transcript	chr18	902766	906667	-1.06686	0.345465	-3.08819	0.00201382	0.00341129
cg07788286	0.34044	3.26e-20	7.06e-19	ENSG00000265179.5	RP11-672L10.2, RP11-672L10.3	processed_transcript	chr18	902766	906667	-1.06686	0.345465	-3.08819	0.00201382	0.00341129
cg15458338	0.334242	1.01e-26	4.1e-25	ENSG00000265179.5	RP11-672L10.2	processed_transcript	chr18	902766	906667	-1.06686	0.345465	-3.08819	0.00201382	0.00341129
cg13940693	0.317735	5.1e-27	2.13e-25	ENSG00000265179.5	RP11-672L10.2, RP11-672L10.3	processed_transcript	chr18	902766	906667	-1.06686	0.345465	-3.08819	0.00201382	0.00341129
cg16457786	0.30715	7.13e-28	3.22e-26	ENSG00000265179.5	RP11-672L10.2	processed_transcript	chr18	902766	906667	-1.06686	0.345465	-3.08819	0.00201382	0.00341129
cg00128702	0.269611	6.54e-16	9.46e-15	ENSG00000265179.5	RP11-672L10.2	processed_transcript	chr18	902766	906667	-1.06686	0.345465	-3.08819	0.00201382	0.00341129
cg17439660	0.267702	5.51e-12	5.33e-11	ENSG00000265179.5	RP11-672L10.2, RP11-672L10.3	processed_transcript	chr18	902766	906667	-1.06686	0.345465	-3.08819	0.00201382	0.00341129
cg06372303	0.225227	3.73e-21	8.8e-20	ENSG00000265179.5	RP11-672L10.2, RP11-672L10.3	processed_transcript	chr18	902766	906667	-1.06686	0.345465	-3.08819	0.00201382	0.00341129
cg19962990	0.217147	3.11e-16	4.64e-15	ENSG00000265179.5	RP11-672L10.2	processed_transcript	chr18	902766	906667	-1.06686	0.345465	-3.08819	0.00201382	0.00341129
cg11850773	0.1928	3.47e-27	1.47e-25	ENSG00000265179.5	RP11-672L10.2	processed_transcript	chr18	902766	906667	-1.06686	0.345465	-3.08819	0.00201382	0.00341129
cg14200170	0.181702	1.18e-14	1.51e-13	ENSG00000265179.5	RP11-672L10.2, RP11-672L10.3	processed_transcript	chr18	902766	906667	-1.06686	0.345465	-3.08819	0.00201382	0.00341129
cg22374233	0.179403	2.17e-11	1.96e-10	ENSG00000265179.5	RP11-672L10.2, RP11-672L10.3	processed_transcript	chr18	902766	906667	-1.06686	0.345465	-3.08819	0.00201382	0.00341129
cg07211875	0.165083	9.26e-17	1.46e-15	ENSG00000265179.5	RP11-672L10.2, RP11-672L10.3	processed_transcript	chr18	902766	906667	-1.06686	0.345465	-3.08819	0.00201382	0.00341129
cg17059658	0.164697	4.94e-15	6.54e-14	ENSG00000265179.5	RP11-672L10.2	processed_transcript	chr18	902766	906667	-1.06686	0.345465	-3.08819	0.00201382	0.00341129
cg22388954	0.152455	2.56e-05	0.000106409	ENSG00000265179.5	RP11-672L10.2	processed_transcript	chr18	902766	906667	-1.06686	0.345465	-3.08819	0.00201382	0.00341129
cg07376535	0.147513	1.88e-13	2.13e-12	ENSG00000265179.5	RP11-672L10.2, RP11-672L10.3	processed_transcript	chr18	902766	906667	-1.06686	0.345465	-3.08819	0.00201382	0.00341129
cg11773720	0.130828	2.17e-05	9.13e-05	ENSG00000265179.5	RP11-672L10.2	processed_transcript	chr18	902766	906667	-1.06686	0.345465	-3.08819	0.00201382	0.00341129
cg14489474	0.0923325	7.55e-09	5.11e-08	ENSG00000265179.5	RP11-672L10.2, RP11-672L10.3	processed_transcript	chr18	902766	906667	-1.06686	0.345465	-3.08819	0.00201382	0.00341129
cg04131468	0.191412	5.09e-17	8.2e-16	ENSG00000265489.1	RP11-1090M7.1	antisense	chr17	12760140	12790242	-4.10087	0.339749	-12.0703	1.52e-33	3.64e-32
cg16026647	0.181155	7.51e-12	7.16e-11	ENSG00000265519.1	CTD-3157E16.1	lincRNA	chr17	15787787	15788205	-1.8823	0.203702	-9.24048	2.45e-20	2.43e-19
cg15825417	0.0845057	1.26e-10	1.05e-09	ENSG00000265519.1	CTD-3157E16.1	lincRNA	chr17	15787787	15788205	-1.8823	0.203702	-9.24048	2.45e-20	2.43e-19
cg05468024	-0.0471483	0.000204079	0.000723661	ENSG00000267073.1	AC005256.1	lincRNA	chr19	1748056	1748745	6.27104	0.470984	13.3147	1.9e-40	7.15e-39
cg21393818	-0.0646713	0.000889764	0.00277781	ENSG00000267123.4	CTD-2357A8.3	lincRNA	chr17	78617389	78632057	3.42409	0.283239	12.0891	1.21e-33	2.92e-32
cg01295785	-0.0418615	0.018343	0.040662	ENSG00000267199.1	RP11-861E21.2	antisense	chr18	12438890	12448205	1.57119	0.254752	6.16751	6.94e-10	2.79e-09
cg10701640	-0.0324397	0.0164595	0.0370387	ENSG00000267288.2	RP13-890H12.2	antisense	chr17	45168800	45171584	2.02272	0.186864	10.8246	2.63e-27	4.24e-26
cg14120049	0.116332	0.00219437	0.0062703	ENSG00000267328.1	AC002398.12	antisense	chr19	35754566	35755490	-3.60516	0.455955	-7.90685	2.64e-15	1.78e-14
cg18229178	0.102277	0.00306454	0.00845513	ENSG00000267328.1	AC002398.12	antisense	chr19	35754566	35755490	-3.60516	0.455955	-7.90685	2.64e-15	1.78e-14
cg01405445	0.0975752	0.00267096	0.00747853	ENSG00000267328.1	AC002398.12	antisense	chr19	35754566	35755490	-3.60516	0.455955	-7.90685	2.64e-15	1.78e-14
cg16615829	0.062187	0.020954	0.0455827	ENSG00000267328.1	AC002398.12	antisense	chr19	35754566	35755490	-3.60516	0.455955	-7.90685	2.64e-15	1.78e-14
cg02457644	0.00792209	0.0158773	0.0359064	ENSG00000267328.1	AC002398.12	antisense	chr19	35754566	35755490	-3.60516	0.455955	-7.90685	2.64e-15	1.78e-14
cg20127035	0.0907258	0.00270591	0.00756649	ENSG00000267414.1	RP11-456K23.1	lincRNA	chr18	44676927	44679717	-1.61129	0.180553	-8.92421	4.49e-19	4.04e-18
cg06015645	0.0747919	0.00723738	0.0181218	ENSG00000267414.1	RP11-456K23.1	lincRNA	chr18	44676927	44679717	-1.61129	0.180553	-8.92421	4.49e-19	4.04e-18
cg13849552	0.0713452	0.00170298	0.00499097	ENSG00000267414.1	RP11-456K23.1	lincRNA	chr18	44676927	44679717	-1.61129	0.180553	-8.92421	4.49e-19	4.04e-18
cg17321214	0.0679839	0.0100001	0.0240355	ENSG00000267414.1	RP11-456K23.1	lincRNA	chr18	44676927	44679717	-1.61129	0.180553	-8.92421	4.49e-19	4.04e-18
cg06907842	0.0615274	0.00655444	0.0165953	ENSG00000267414.1	RP11-456K23.1	lincRNA	chr18	44676927	44679717	-1.61129	0.180553	-8.92421	4.49e-19	4.04e-18
cg20298895	0.0592094	0.0198074	0.0434489	ENSG00000267414.1	RP11-456K23.1	lincRNA	chr18	44676927	44679717	-1.61129	0.180553	-8.92421	4.49e-19	4.04e-18
cg15392269	0.0513362	0.0154769	0.0351278	ENSG00000267414.1	RP11-456K23.1	lincRNA	chr18	44676927	44679717	-1.61129	0.180553	-8.92421	4.49e-19	4.04e-18
cg00093095	-0.0620164	0.000392296	0.00131768	ENSG00000267432.4	RP11-559N14.5	processed_transcript	chr17	78484882	78503056	3.83606	0.388305	9.87897	5.14e-23	6.12e-22
cg03254161	-0.0307523	0.000101081	0.000379243	ENSG00000267432.4	RP11-559N14.5	processed_transcript	chr17	78484882	78503056	3.83606	0.388305	9.87897	5.14e-23	6.12e-22
cg13916740	0.483814	1.07e-32	7.71e-31	ENSG00000267454.4	ZNF582-AS1	lincRNA	chr19	56393656	56399172	-1.76123	0.171075	-10.295	7.42e-25	1.02e-23
cg20984085	0.424767	3.79e-33	2.85e-31	ENSG00000267454.4	ZNF582-AS1	lincRNA	chr19	56393656	56399172	-1.76123	0.171075	-10.295	7.42e-25	1.02e-23
cg24039631	0.403361	1.72e-29	9.1e-28	ENSG00000267454.4	ZNF582-AS1	lincRNA	chr19	56393656	56399172	-1.76123	0.171075	-10.295	7.42e-25	1.02e-23
cg22647407	0.390575	6.53e-29	3.26e-27	ENSG00000267454.4	ZNF582-AS1	lincRNA	chr19	56393656	56399172	-1.76123	0.171075	-10.295	7.42e-25	1.02e-23
cg02763101	0.345435	1.84e-25	6.57e-24	ENSG00000267454.4	ZNF582-AS1	lincRNA	chr19	56393656	56399172	-1.76123	0.171075	-10.295	7.42e-25	1.02e-23
cg25267765	0.344613	4.71e-19	9.17e-18	ENSG00000267454.4	ZNF582-AS1	lincRNA	chr19	56393656	56399172	-1.76123	0.171075	-10.295	7.42e-25	1.02e-23
cg07135042	0.338981	1.89e-21	4.6e-20	ENSG00000267454.4	ZNF582-AS1	lincRNA	chr19	56393656	56399172	-1.76123	0.171075	-10.295	7.42e-25	1.02e-23
cg09568464	0.330989	3.22e-32	2.21e-30	ENSG00000267454.4	ZNF582-AS1	lincRNA	chr19	56393656	56399172	-1.76123	0.171075	-10.295	7.42e-25	1.02e-23
cg24733179	0.313643	8.69e-16	1.24e-14	ENSG00000267454.4	ZNF582-AS1	lincRNA	chr19	56393656	56399172	-1.76123	0.171075	-10.295	7.42e-25	1.02e-23
cg08464824	0.295817	4.08e-25	1.41e-23	ENSG00000267454.4	ZNF582-AS1	lincRNA	chr19	56393656	56399172	-1.76123	0.171075	-10.295	7.42e-25	1.02e-23
cg11740878	0.184998	1.26e-12	1.31e-11	ENSG00000267454.4	ZNF582-AS1	lincRNA	chr19	56393656	56399172	-1.76123	0.171075	-10.295	7.42e-25	1.02e-23
cg25320443	-0.0427329	0.00788045	0.0195284	ENSG00000267523.1	CTD-2537I9.12	antisense	chr19	55661901	55674715	1.4833	0.194496	7.62636	2.41e-14	1.49e-13
cg23925513	0.0558322	0.0210957	0.0458532	ENSG00000267532.3	RP11-589P10.7, MIR497HG	antisense	chr17	7015818	7019659	-2.37389	0.159886	-14.8474	7.23e-50	4.82e-48
cg11235787	0.0504998	2.38e-08	1.52e-07	ENSG00000267532.3	RP11-589P10.7, MIR497HG	antisense	chr17	7015818	7019659	-2.37389	0.159886	-14.8474	7.23e-50	4.82e-48
cg17415576	0.0352959	6.83e-07	3.59e-06	ENSG00000267532.3	RP11-589P10.7, MIR497HG	antisense	chr17	7015818	7019659	-2.37389	0.159886	-14.8474	7.23e-50	4.82e-48
cg01436998	0.327389	9.05e-19	1.72e-17	ENSG00000267640.4	CTD-2554C21.2	lincRNA	chr19	37817359	37826638	-1.45072	0.27332	-5.30779	1.11e-07	3.47e-07
cg27353143	0.267838	7.2e-17	1.14e-15	ENSG00000267640.4	CTD-2554C21.2	lincRNA	chr19	37817359	37826638	-1.45072	0.27332	-5.30779	1.11e-07	3.47e-07
cg00578032	0.206062	1.77e-15	2.45e-14	ENSG00000267640.4	CTD-2554C21.2	lincRNA	chr19	37817359	37826638	-1.45072	0.27332	-5.30779	1.11e-07	3.47e-07
cg25819441	0.0964822	0.000182122	0.000651854	ENSG00000267640.4	CTD-2554C21.2	lincRNA	chr19	37817359	37826638	-1.45072	0.27332	-5.30779	1.11e-07	3.47e-07
cg05404912	-0.0662621	0.00248517	0.00701096	ENSG00000267698.1	AC002116.7	antisense	chr19	36014508	36045972	1.11154	0.134766	8.24792	1.61e-16	1.2e-15
cg10621374	-0.0431087	0.0119711	0.0281219	ENSG00000267698.1	AC002116.8, AC002116.7	antisense	chr19	36014508	36045972	1.11154	0.134766	8.24792	1.61e-16	1.2e-15
cg21940313	-0.142508	2.58e-11	2.32e-10	ENSG00000267747.1	RP11-392O1.4	antisense	chr17	43544785	43610338	3.68806	0.398454	9.25593	2.12e-20	2.11e-19
cg27037551	0.271269	1.39e-18	2.59e-17	ENSG00000267774.2	RP11-2N1.2	antisense	chr18	59696459	59698111	-4.08292	0.501538	-8.14079	3.93e-16	2.83e-15
cg15215560	0.254361	1.52e-14	1.91e-13	ENSG00000267774.2	RP11-2N1.2	antisense	chr18	59696459	59698111	-4.08292	0.501538	-8.14079	3.93e-16	2.83e-15
cg16423682	0.228637	2.81e-14	3.44e-13	ENSG00000267774.2	RP11-2N1.2	antisense	chr18	59696459	59698111	-4.08292	0.501538	-8.14079	3.93e-16	2.83e-15
cg19184415	0.206725	9.5e-17	1.49e-15	ENSG00000267774.2	RP11-2N1.2	antisense	chr18	59696459	59698111	-4.08292	0.501538	-8.14079	3.93e-16	2.83e-15
cg02774186	0.195861	2.16e-05	9.07e-05	ENSG00000267774.2	RP11-2N1.2	antisense	chr18	59696459	59698111	-4.08292	0.501538	-8.14079	3.93e-16	2.83e-15
cg17298666	0.136307	2.71e-06	1.31e-05	ENSG00000267774.2	RP11-2N1.2	antisense	chr18	59696459	59698111	-4.08292	0.501538	-8.14079	3.93e-16	2.83e-15
cg23903160	0.0626027	0.00151768	0.00449962	ENSG00000267774.2	RP11-2N1.2	antisense	chr18	59696459	59698111	-4.08292	0.501538	-8.14079	3.93e-16	2.83e-15
cg13643894	0.0596403	0.0105612	0.0252069	ENSG00000267774.2	RP11-2N1.2	antisense	chr18	59696459	59698111	-4.08292	0.501538	-8.14079	3.93e-16	2.83e-15
cg03120782	-0.274375	1.66e-17	2.81e-16	ENSG00000268189.2	AC005785.2	processed_transcript	chr19	15379076	15381194	1.27634	0.171596	7.43809	1.02e-13	5.98e-13
cg15212942	-0.0753105	0.000119848	0.000443653	ENSG00000268189.2	AC005785.2	processed_transcript	chr19	15379076	15381194	1.27634	0.171596	7.43809	1.02e-13	5.98e-13
cg14319655	-0.0125469	0.00469913	0.0123681	ENSG00000268189.2	AC005785.2	processed_transcript	chr19	15379076	15381194	1.27634	0.171596	7.43809	1.02e-13	5.98e-13
cg21037935	-0.159321	3.2e-08	2e-07	ENSG00000268307.1	CTD-2619J13.13	lincRNA	chr19	58400221	58400679	3.03225	0.438575	6.91387	4.72e-12	2.33e-11
cg16801887	0.421892	5.66e-27	2.35e-25	ENSG00000268388.4	FENDRR	lincRNA	chr16	86474529	86509099	-1.96999	0.182251	-10.8092	3.11e-27	5e-26
cg01586959	0.307361	1.45e-16	2.23e-15	ENSG00000268388.4	FENDRR	lincRNA	chr16	86474529	86509099	-1.96999	0.182251	-10.8092	3.11e-27	5e-26
cg02000882	0.287524	1.01e-12	1.05e-11	ENSG00000268388.4	FENDRR	lincRNA	chr16	86474529	86509099	-1.96999	0.182251	-10.8092	3.11e-27	5e-26
cg04930630	0.176719	3.37e-06	1.61e-05	ENSG00000268388.4	FENDRR	lincRNA	chr16	86474529	86509099	-1.96999	0.182251	-10.8092	3.11e-27	5e-26
cg16630791	0.0759045	0.0182593	0.0405013	ENSG00000268388.4	FENDRR	lincRNA	chr16	86474529	86509099	-1.96999	0.182251	-10.8092	3.11e-27	5e-26
cg07769121	0.0715803	0.0159706	0.0360868	ENSG00000268388.4	FENDRR	lincRNA	chr16	86474529	86509099	-1.96999	0.182251	-10.8092	3.11e-27	5e-26
cg06602857	0.0685942	0.003127	0.00860936	ENSG00000268388.4	FENDRR	lincRNA	chr16	86474529	86509099	-1.96999	0.182251	-10.8092	3.11e-27	5e-26
cg01142386	0.0669674	0.014001	0.0322141	ENSG00000268388.4	FENDRR	lincRNA	chr16	86474529	86509099	-1.96999	0.182251	-10.8092	3.11e-27	5e-26
cg26918279	0.0633909	0.00577167	0.0148411	ENSG00000268388.4	FENDRR	lincRNA	chr16	86474529	86509099	-1.96999	0.182251	-10.8092	3.11e-27	5e-26
cg01145317	0.0610966	0.0117141	0.0275904	ENSG00000268388.4	FENDRR	lincRNA	chr16	86474529	86509099	-1.96999	0.182251	-10.8092	3.11e-27	5e-26
cg05555338	0.0596115	0.0158133	0.0357869	ENSG00000268388.4	FENDRR	lincRNA	chr16	86474529	86509099	-1.96999	0.182251	-10.8092	3.11e-27	5e-26
cg00606102	0.0563612	0.00367541	0.00994188	ENSG00000268388.4	FENDRR	lincRNA	chr16	86474529	86509099	-1.96999	0.182251	-10.8092	3.11e-27	5e-26
cg01168283	0.0552607	0.0150858	0.0343537	ENSG00000268388.4	FENDRR	lincRNA	chr16	86474529	86509099	-1.96999	0.182251	-10.8092	3.11e-27	5e-26
cg26827987	0.170827	0.000167503	0.000603208	ENSG00000268505.1	RP11-805I24.3	lincRNA	chr16	86192793	86198913	-2.35133	0.215087	-10.932	8.1e-28	1.34e-26
cg00422461	0.0835492	0.00688996	0.0173431	ENSG00000268505.1	RP11-805I24.3	lincRNA	chr16	86192793	86198913	-2.35133	0.215087	-10.932	8.1e-28	1.34e-26
cg14396421	0.301446	1.33e-13	1.53e-12	ENSG00000268555.1	RP11-678G14.3	lincRNA	chr19	21570822	21587322	-3.52607	0.416871	-8.4584	2.71e-17	2.13e-16
cg10741422	0.285527	6.5e-13	6.94e-12	ENSG00000268555.1	RP11-678G14.3	lincRNA	chr19	21570822	21587322	-3.52607	0.416871	-8.4584	2.71e-17	2.13e-16
cg10655021	0.277272	5.63e-11	4.88e-10	ENSG00000268555.1	RP11-678G14.3	lincRNA	chr19	21570822	21587322	-3.52607	0.416871	-8.4584	2.71e-17	2.13e-16
cg00455402	0.156477	1.18e-10	9.86e-10	ENSG00000268555.1	RP11-678G14.3	lincRNA	chr19	21570822	21587322	-3.52607	0.416871	-8.4584	2.71e-17	2.13e-16
cg02478708	-0.195599	8.43e-09	5.67e-08	ENSG00000268734.1	CTB-61M7.2	lincRNA	chr19	54890673	54891420	1.55808	0.36174	4.30718	1.65e-05	3.9e-05
cg15722603	-0.0761467	6.89e-05	0.000266304	ENSG00000268812.3	RP1-102K2.8	antisense	chr22	30246205	30246998	1.69595	0.183644	9.23499	2.58e-20	2.56e-19
cg07316313	-0.0380453	0.00508234	0.0132596	ENSG00000268812.3	RP1-102K2.8	antisense	chr22	30246205	30246998	1.69595	0.183644	9.23499	2.58e-20	2.56e-19
cg23486853	-0.0327047	3.2e-17	5.26e-16	ENSG00000268812.3	RP1-102K2.8	antisense	chr22	30246205	30246998	1.69595	0.183644	9.23499	2.58e-20	2.56e-19
cg22286978	0.365731	2.05e-20	4.51e-19	ENSG00000268895.4	A1BG-AS1	antisense	chr19	58347751	58355183	-1.07337	0.161383	-6.65107	2.91e-11	1.34e-10
cg03123289	0.230717	1.23e-13	1.41e-12	ENSG00000268895.4	A1BG-AS1	antisense	chr19	58347751	58355183	-1.07337	0.161383	-6.65107	2.91e-11	1.34e-10
cg10734734	0.0220162	0.00951867	0.0230199	ENSG00000268895.4	A1BG-AS1	antisense	chr19	58347751	58355183	-1.07337	0.161383	-6.65107	2.91e-11	1.34e-10
cg09962925	0.0807122	5.42e-25	1.85e-23	ENSG00000269186.1	LINC01082	lincRNA	chr16	86196181	86199720	-2.57511	0.223492	-11.5222	1.02e-30	2.04e-29
cg10449665	0.0721234	3.4e-10	2.7e-09	ENSG00000269186.1	LINC01082	lincRNA	chr16	86196181	86199720	-2.57511	0.223492	-11.5222	1.02e-30	2.04e-29
cg27119222	-0.0544381	0.0126168	0.0294287	ENSG00000269821.1	KCNQ1OT1	antisense	chr11	2608328	2699994	1.82826	0.19845	9.21271	3.18e-20	3.13e-19
cg07277962	-0.0484253	0.000142233	0.000519217	ENSG00000269899.1	RP11-589N15.2	sense_intronic	chr8	11846154	11846391	1.79169	0.177861	10.0735	7.23e-24	9.23e-23
cg03919694	0.128224	0.000460725	0.00152611	ENSG00000270607.1	RP11-359E10.1	lincRNA	chr11	19710934	19712619	-1.76246	0.283124	-6.22504	4.81e-10	1.96e-09
cg25607321	0.111629	0.000116045	0.000430656	ENSG00000270607.1	RP11-359E10.1	lincRNA	chr11	19710934	19712619	-1.76246	0.283124	-6.22504	4.81e-10	1.96e-09
cg23614979	0.0938589	0.000609254	0.00196836	ENSG00000270607.1	RP11-359E10.1	lincRNA	chr11	19710934	19712619	-1.76246	0.283124	-6.22504	4.81e-10	1.96e-09
cg11279425	0.0408454	0.00507427	0.0132412	ENSG00000270607.1	RP11-359E10.1	lincRNA	chr11	19710934	19712619	-1.76246	0.283124	-6.22504	4.81e-10	1.96e-09
cg23522611	-0.0515856	1.07e-10	9.01e-10	ENSG00000270640.1	AC104695.3, RP11-373D23.2	sense_intronic	chr2	28396815	28397110	2.10858	0.36294	5.80973	6.26e-09	2.25e-08
cg08836542	-0.0466786	0.000206265	0.000730776	ENSG00000270640.1	RP11-373D23.2	sense_intronic	chr2	28396815	28397110	2.10858	0.36294	5.80973	6.26e-09	2.25e-08
cg25784219	-0.0353161	0.0135864	0.0313803	ENSG00000270640.1	AC104695.3, RP11-373D23.2	sense_intronic	chr2	28396815	28397110	2.10858	0.36294	5.80973	6.26e-09	2.25e-08
cg08641514	-0.0652326	0.0142475	0.0326936	ENSG00000270933.1	CTD-2227E11.1	lincRNA	chr7	25948657	25949403	2.19096	0.195808	11.1893	4.6e-29	8.28e-28
cg08767938	-0.0441188	0.0210893	0.0458416	ENSG00000270933.1	CTD-2227E11.1	lincRNA	chr7	25948657	25949403	2.19096	0.195808	11.1893	4.6e-29	8.28e-28
cg03853208	-0.0383269	0.0205263	0.0447953	ENSG00000270933.1	CTD-2227E11.1	lincRNA	chr7	25948657	25949403	2.19096	0.195808	11.1893	4.6e-29	8.28e-28
cg25771013	-0.034005	0.00693121	0.017433	ENSG00000270933.1	CTD-2227E11.1	lincRNA	chr7	25948657	25949403	2.19096	0.195808	11.1893	4.6e-29	8.28e-28
cg27219399	0.0607949	0.00380627	0.0102558	ENSG00000270964.1	RP11-502I4.3	lincRNA	chr15	67541072	67542604	-1.30054	0.125804	-10.3378	4.75e-25	6.58e-24
cg11838640	0.00514668	1.29e-05	5.61e-05	ENSG00000270964.1	RP11-502I4.3	lincRNA	chr15	67541072	67542604	-1.30054	0.125804	-10.3378	4.75e-25	6.58e-24
cg06826115	0.00483229	0.000988366	0.00305463	ENSG00000270964.1	RP11-502I4.3	lincRNA	chr15	67541072	67542604	-1.30054	0.125804	-10.3378	4.75e-25	6.58e-24
cg14114267	-0.0935912	0.00140652	0.00420223	ENSG00000271151.1	RP11-394I13.2	lincRNA	chr2	173968351	173969418	1.59109	0.197331	8.06303	7.44e-16	5.23e-15
cg13754720	-0.229597	1.89e-13	2.14e-12	ENSG00000271659.1	RP11-435O5.4	antisense	chr9	95514045	95514520	2.10129	0.239461	8.77508	1.71e-18	1.47e-17
cg01222719	-0.171634	2.99e-07	1.65e-06	ENSG00000271659.1	RP11-435O5.4	antisense	chr9	95514045	95514520	2.10129	0.239461	8.77508	1.71e-18	1.47e-17
cg00596763	0.283733	1.27e-43	2.58e-41	ENSG00000271824.1	AC009014.3	lincRNA	chr5	136191468	136193134	-1.65952	0.297655	-5.57532	2.47e-08	8.33e-08
cg24963147	0.264158	7.57e-34	6.06e-32	ENSG00000271824.1	AC009014.3	lincRNA	chr5	136191468	136193134	-1.65952	0.297655	-5.57532	2.47e-08	8.33e-08
cg11620475	0.170678	9.52e-15	1.22e-13	ENSG00000271824.1	AC009014.3	lincRNA	chr5	136191468	136193134	-1.65952	0.297655	-5.57532	2.47e-08	8.33e-08
cg06680397	0.0685537	0.0116049	0.02736	ENSG00000271824.1	AC009014.3	lincRNA	chr5	136191468	136193134	-1.65952	0.297655	-5.57532	2.47e-08	8.33e-08
cg23647640	-0.2304	4.08e-14	4.92e-13	ENSG00000271959.1	CTD-3064M3.7	antisense	chr8	141434545	141437954	2.00068	0.274698	7.28319	3.26e-13	1.82e-12
cg25004270	0.00645213	0.0026734	0.00748487	ENSG00000272106.1	RP11-345P4.9	antisense	chr1	1613758	1615795	-1.1568	0.0973324	-11.885	1.42e-32	3.19e-31
cg15652741	0.00340592	0.0133439	0.030894	ENSG00000272106.1	RP11-345P4.9	antisense	chr1	1613758	1615795	-1.1568	0.0973324	-11.885	1.42e-32	3.19e-31
cg16398329	0.499322	8.76e-30	4.76e-28	ENSG00000272143.1	FGF14-IT1, FGF14-AS2	lincRNA	chr13	102394630	102395703	-2.0332	0.215147	-9.45029	3.38e-21	3.55e-20
cg25082959	0.481815	5.89e-26	2.22e-24	ENSG00000272143.1	FGF14-IT1, FGF14-AS2	lincRNA	chr13	102394630	102395703	-2.0332	0.215147	-9.45029	3.38e-21	3.55e-20
cg24507144	0.480527	2.88e-27	1.23e-25	ENSG00000272143.1	FGF14-IT1, FGF14-AS2	lincRNA	chr13	102394630	102395703	-2.0332	0.215147	-9.45029	3.38e-21	3.55e-20
cg06313119	0.396964	1.51e-20	3.38e-19	ENSG00000272143.1	FGF14-IT1, FGF14-AS2	lincRNA	chr13	102394630	102395703	-2.0332	0.215147	-9.45029	3.38e-21	3.55e-20
cg26097011	0.329777	7.64e-23	2.12e-21	ENSG00000272143.1	FGF14-IT1, FGF14-AS2	lincRNA	chr13	102394630	102395703	-2.0332	0.215147	-9.45029	3.38e-21	3.55e-20
cg11100836	0.126086	1.21e-08	8e-08	ENSG00000272143.1	FGF14-IT1, FGF14-AS2	lincRNA	chr13	102394630	102395703	-2.0332	0.215147	-9.45029	3.38e-21	3.55e-20
cg07871313	-0.14473	9.64e-05	0.000363015	ENSG00000272168.4	CASC15	lincRNA	chr6	21664772	22214505	1.76011	0.22778	7.72724	1.1e-14	7.01e-14
cg12892747	-0.0869893	0.00702794	0.0176508	ENSG00000272218.1	RP11-11N5.3	lincRNA	chr4	186892552	186892983	4.85199	0.616056	7.87589	3.38e-15	2.25e-14
cg05682319	-0.145432	1.43e-08	9.36e-08	ENSG00000272347.1	RP11-43F13.4	lincRNA	chr5	1005039	1006623	2.04144	0.237444	8.59758	8.14e-18	6.66e-17
cg18801579	-0.113362	2.21e-08	1.41e-07	ENSG00000272347.1	RP11-43F13.4	lincRNA	chr5	1005039	1006623	2.04144	0.237444	8.59758	8.14e-18	6.66e-17
cg03575512	-0.101938	1.9e-14	2.37e-13	ENSG00000272347.1	RP11-43F13.4	lincRNA	chr5	1005039	1006623	2.04144	0.237444	8.59758	8.14e-18	6.66e-17
cg03877420	-0.0939441	1.35e-11	1.25e-10	ENSG00000272347.1	RP11-43F13.4	lincRNA	chr5	1005039	1006623	2.04144	0.237444	8.59758	8.14e-18	6.66e-17
cg13992911	-0.0390436	4.5e-05	0.000179354	ENSG00000272347.1	RP11-43F13.4	lincRNA	chr5	1005039	1006623	2.04144	0.237444	8.59758	8.14e-18	6.66e-17
cg02409090	0.148705	4.99e-11	4.35e-10	ENSG00000272463.1	RP11-532F6.3, RP11-532F6.4	lincRNA	chr6	708592	711405	-2.56398	0.179423	-14.2901	2.52e-46	1.39e-44
cg14992108	-0.113248	4.29e-07	2.32e-06	ENSG00000272502.1	RP11-713M15.2	antisense	chr8	120812219	120813359	2.75371	0.193378	14.24	5.17e-46	2.79e-44
cg10441379	-0.35038	3.99e-29	2.03e-27	ENSG00000272525.1	RP11-79P5.9	lincRNA	chr5	73497550	73498293	1.01721	0.156219	6.51143	7.44e-11	3.29e-10
cg14854901	-0.20696	1.25e-49	4.42e-47	ENSG00000272525.1	RP11-79P5.9	lincRNA	chr5	73497550	73498293	1.01721	0.156219	6.51143	7.44e-11	3.29e-10
cg14012294	-0.166957	6.99e-47	1.91e-44	ENSG00000272525.1	RP11-79P5.9	lincRNA	chr5	73497550	73498293	1.01721	0.156219	6.51143	7.44e-11	3.29e-10
cg02346282	-0.129385	2.41e-06	1.17e-05	ENSG00000272525.1	RP11-79P5.9	lincRNA	chr5	73497550	73498293	1.01721	0.156219	6.51143	7.44e-11	3.29e-10
cg17561030	-0.106772	3.18e-33	2.4e-31	ENSG00000272525.1	RP11-79P5.9	lincRNA	chr5	73497550	73498293	1.01721	0.156219	6.51143	7.44e-11	3.29e-10
cg07318568	-0.0579059	2.02e-06	9.95e-06	ENSG00000272556.1	RP11-638I8.1	lincRNA	chr7	45814602	45815263	1.29529	0.186952	6.92846	4.25e-12	2.11e-11
cg14349144	-0.108457	0.000192189	0.000684773	ENSG00000272620.1	AFAP1-AS1	antisense	chr4	7754090	7778928	5.89825	0.477738	12.3462	5.11e-35	1.34e-33
cg23313650	0.0183481	0.000480395	0.00158518	ENSG00000272686.1	RP11-390E23.6	antisense	chr7	123749068	123751166	-1.27239	0.110595	-11.505	1.24e-30	2.48e-29
cg20617676	0.00802123	0.00742119	0.0185276	ENSG00000272686.1	RP11-390E23.6	antisense	chr7	123749068	123751166	-1.27239	0.110595	-11.505	1.24e-30	2.48e-29
cg27392444	0.00636697	0.00608451	0.0155457	ENSG00000272686.1	RP11-390E23.6	antisense	chr7	123749068	123751166	-1.27239	0.110595	-11.505	1.24e-30	2.48e-29
cg17458436	-0.00757083	0.0122734	0.0287305	ENSG00000272843.1	RP11-313P13.5	antisense	chr7	72924418	72925125	2.34792	0.348351	6.7401	1.58e-11	7.47e-11
cg11055967	-0.106214	4.53e-06	2.12e-05	ENSG00000272872.1	LL22NC03-N14H11.1	sense_intronic	chr22	15823197	15823890	3.1988	0.439405	7.27984	3.34e-13	1.86e-12
cg27043453	-0.00493441	0.00991764	0.0238608	ENSG00000272953.1	RP11-1275H24.2	lincRNA	chr7	5425770	5426401	1.26176	0.194653	6.48209	9.05e-11	3.97e-10
cg11896795	-0.00263865	0.012853	0.0299051	ENSG00000272953.1	RP11-1275H24.2	lincRNA	chr7	5425770	5426401	1.26176	0.194653	6.48209	9.05e-11	3.97e-10
cg14310606	-0.0500322	3.18e-09	2.25e-08	ENSG00000273066.4	RP11-216L13.19, RP11-216L13.18	processed_transcript	chr9	136799223	136810042	1.75326	0.211166	8.30273	1.02e-16	7.73e-16
cg05627103	-0.0219747	0.0129784	0.0301556	ENSG00000273066.4	RP11-216L13.19, RP11-216L13.18	processed_transcript	chr9	136799223	136810042	1.75326	0.211166	8.30273	1.02e-16	7.73e-16
cg24112628	-0.0643083	0.0220671	0.0476583	ENSG00000273132.1	RP11-350J20.12	antisense	chr6	149852462	149853192	4.63645	0.295091	15.712	1.25e-55	1.16e-53
cg08227353	-0.311208	2.71e-38	3.35e-36	ENSG00000273162.1	RP11-108L7.15	lincRNA	chr10	101060029	101061005	1.05879	0.137024	7.72704	1.1e-14	7.02e-14
cg26605164	-0.165977	5.29e-18	9.36e-17	ENSG00000273162.1	RP11-108L7.15	lincRNA	chr10	101060029	101061005	1.05879	0.137024	7.72704	1.1e-14	7.02e-14
cg23534216	-0.0921304	1.22e-12	1.26e-11	ENSG00000273162.1	RP11-108L7.15	lincRNA	chr10	101060029	101061005	1.05879	0.137024	7.72704	1.1e-14	7.02e-14
cg11533523	-0.0362292	0.0182168	0.0404205	ENSG00000273319.1	RP11-138A9.2	lincRNA	chr7	130936464	130939661	1.3998	0.29033	4.82142	1.43e-06	3.88e-06
cg25133533	0.106556	1.79e-05	7.61e-05	ENSG00000274993.1	RP11-395B7.2	antisense	chr7	100963828	100968124	-1.18639	0.207392	-5.72055	1.06e-08	3.73e-08
cg03639917	0.084906	1.26e-09	9.35e-09	ENSG00000274993.1	RP11-395B7.2	antisense	chr7	100963828	100968124	-1.18639	0.207392	-5.72055	1.06e-08	3.73e-08
cg03979532	0.0546163	0.00126383	0.00381542	ENSG00000274993.1	RP11-395B7.2	antisense	chr7	100963828	100968124	-1.18639	0.207392	-5.72055	1.06e-08	3.73e-08
cg00841151	0.034714	0.000897317	0.00279943	ENSG00000274993.1	RP11-395B7.2	antisense	chr7	100963828	100968124	-1.18639	0.207392	-5.72055	1.06e-08	3.73e-08
cg20354141	0.0279586	0.012605	0.0294055	ENSG00000274993.1	RP11-395B7.2	antisense	chr7	100963828	100968124	-1.18639	0.207392	-5.72055	1.06e-08	3.73e-08
cg16365807	-0.184825	3.82e-09	2.68e-08	ENSG00000280109.1	PLAC4	TEC	chr21	41175231	41185239	4.92028	0.35783	13.7503	5.07e-43	2.26e-41
